# Supplementary material for: CuI-catalyzed photochemical or thermal reactions of 3-(2-azidobenzylidene)lactams. Application to the synthesis of fused indoles
Source: Royal Society of Chemistry journal article supplement (doi:10.1039/c001715a), 2010-01-01

# **CuI-catalyzed photochemical or thermal reactions of 3-(2-azidobenzylidene)lactams. Application to the synthesis of fused indoles**

**ZongJun Shi, Bing Li, YuWei Ren, ShenCi Lu, Wei Zhang \***

*State Key Laboratory of Applied Organic Chemistry and Department of Chemistry,*

*Lanzhou University, Lanzhou, Gansu, 730000, People's Republic of China*

zhang\_wei6275@yahoo.com

## **Supporting Information**

| Content                                            | page  |
|----------------------------------------------------|-------|
| General remark                                     | 2     |
| Experimental procedures                            | 3-5   |
| References                                         | 6     |
| Analytical data for compounds <b>1a-1p</b>         | 7-9   |
| Analytical data for compounds <b>2a-2p</b>         | 10-14 |
| <sup>1</sup> H NMR and <sup>13</sup> C NMR spectra | 15-30 |

**General remark:**

All reagents were purchased from commercial suppliers and used without further purification. Flash chromatography was carried out with silica gel (200-300 mesh). Analytical TLC was performed with silica gel GF254 plates, and the products were visualized by UV detection.  $^1\text{H}$  NMR and  $^{13}\text{C}$  NMR (300 or 400 MHz and 75 or 100 MHz, respectively) spectra were recorded in  $\text{CDCl}_3$ , or  $\text{DMSO-d}_6$ , or  $\text{CD}_3\text{COCD}_3$ . Chemical shifts ( $\delta$ ) are reported in ppm using TMS as internal standard and spin-spin coupling constants ( $J$ ) are given in Hz. EI-MS spectra were measured on an HP 5988A spectrometer by direct inlet at 70 eV. The high resolution mass spectra (HRMS) were measured on a Bruker Daltonics APEX II 47e spectrometer by ESI.

## Experimental procedures:

General procedure for preparation of **1a-1i**<sup>1</sup>:

3-(2-azidobenzylidene)indol-2-one (**1a**): To a 50 mL single-necked flask containing 10 mL water and 10 mL ethanol was added sodium hydroxide (10 mmol, 0.4 g). The reaction mixture was stirred until the solid was dissolved. Then cooled to room temperature, indole-2-one (5.0 mmol) and 2-azidobenzaldehyde (5.5 mmol) was added. The reaction mixture was stirred at room temperature for 1.0 hour. After addition of water (25 mL), the mixture was filtered and washed with water to give the desired products, yield: 85%.

General procedure for preparation of **2a-2b, 4, 5**<sup>2</sup>:

Ethyl-4-(2-azidobenzylidene)-4,5-dihydro-1,2-dimethyl-5-oxo-1*H*-pyrrole-3-carboxylate (**2a**): To a 50 mL single-necked flask containing 8 mL absolute ethanol was added ethyl 4,5-dihydro-1,2-dimethyl-5-oxo-1*H*-pyrrole-3-carboxylate (8.0 mmol), stirred and at 0°C 2-azidobenzaldehyde (5.0 mmol) and pyrrolidine (10 mmol) which were dissolved in 10 mL absolute ethanol were dropped slowly. Then the mixture was stirred at room temperature for 2.0 hours. After addition of water (25 mL), the mixture was filtered and washed with water to give the desired products, yield: 95%.

General procedure for preparation of **3a-3b**<sup>3</sup>:

4-(2-azidobenzylidene)-3-methyl-1-phenyl-1*H*-pyrazol-5(4*H*)-one (**3a**): To a 50 mL single-necked flask containing 10 mL DMF was added 3-Methyl-1-phenyl-5-pyrazolone (5.0 mmol), 2-azidobenzaldehyde (5.5 mmol) and EDDA (0.5 mmol). The reaction mixture was stirred at room temperature for 2.5 hours. After addition of water (25 mL), the mixture was filtered and washed with water to give the desired products, yield: 85%.

### Typical experimental procedures for photolysis

(1) **1a** (0.26 g, 1.0 mmol) was dissolved in 200 mL dry dichloromethane in two 100 mL Pyrex flasks. The solution was deaerated by bubbling Ar for 30 min and irradiated at  $\lambda \geq 300$  nm with a medium-pressure mercury lamp (500 W) at ambient temperature until the complete conversion of the starting material. The progress of reaction was monitored by TLC at regular intervals. After the solvent was removed under reduced pressure, the residue was separated by column chromatography on silica gel eluted by hexane : acetone 10 : 1 ( v/v ) to afford product **6a**.

(2) **1a** (0.26 g, 1.0 mmol) and CuI (0.18 g, 1.0 mmol) were dissolved in 200 mL dry acetonitrile in two 100 mL Pyrex flasks. The solution was deaerated by bubbling Ar for 30 min and irradiated at  $\lambda \geq 300$  nm with a medium-pressure mercury lamp (500 W) at ambient temperature until the complete conversion of the starting material. The progress of reaction was monitored by TLC at regular intervals. The solution was diluted with an equivalent volume of methylene dichloride and washed 2  $\times$  with ice-cold 10% NH<sub>4</sub>OH in saturated NH<sub>4</sub>Cl (1:4), 3  $\times$  with ice-cold H<sub>2</sub>O (until the aqueous phase exhibited pH = 7), and 3 $\times$  with brine, dried over Na<sub>2</sub>SO<sub>4</sub>, and evaporated under reduced pressure. The residue was separated by column chromatography on silica gel eluted by hexane : acetone 10 : 1 ( v/v ) to afford product **6a**.

### Typical experimental procedures for thermolysis

3-(2-azidobenzylidene) indol-2-one **1a** (0.26 g, 1.0 mmol) was dissolved in 50 mL dry xylene in 100 mL round-bottom flask. The solution was deaerated by bubbling Ar for half an hour and refluxed for 12 hours under the Ar. The progress of reaction was monitored by TLC at regular intervals of time. After the xylene was removed under

reduced pressure, the residue was separated by column chromatography on silica gel eluted by hexane : acetate 10:1(v/v) to afforded product **6a**. The solid was further purified by recrystallization from methanol.

**References:**

- (1) E. P. Kohler, H. M. Chadwell, *Org Synth.*, 1922, **2**:1.
- (2) K. Ashok, J. K. Saxena, M. S. Prem, *Medicinal Chemistry*, 2008, **4**, 577.
- (3) Y. Hu, P. Wei, H. Zhou, *Chinese Chemical Letters.*, 2006, **17**, 299.

## Analytical data for compounds (1a-1i, 2a-2c, 3a-3b, 4, 5)

3-(2-azidobenzylidene)indolin-2-one (**1a**): Pale yellow solid;  $^1\text{H}$  NMR (400 MHz,  $\text{CDCl}_3$ ):  $\delta = 8.08$  (s, 1H, NH), 7.81 (s, 1H, CH), 7.72 (d, 1H,  $J = 7.2$  Hz, ArCH), 7.49 (t, 1H,  $J = 7.6$  Hz, ArCH), 7.41 (d, 1H,  $J = 7.6$  Hz, ArCH), 7.30-7.19 (m, 3H, ArCH), 6.89 - 6.83 (m, 2H, ArCH).

3-(2-azidobenzylidene)-1-methylindolin-2-one (**1b**): Pale yellow solid;  $^1\text{H}$  NMR (300 MHz,  $\text{CDCl}_3$ ):  $\delta = 8.55$  (d, 1H,  $J = 8.4$  Hz, ArCH), 7.78 (s, 1H, CH), 7.56 (d, 1H,  $J = 6.9$  Hz, ArCH), 7.44 (t, 1H,  $J = 8.4$  Hz, ArCH), 7.31 (d, 1H,  $J = 7.5$  Hz, ArCH), 7.18-7.23 (m, 2H, ArCH), 7.07 (t, 1H,  $J = 7.5$  Hz, ArCH), 6.80 (d, 1H,  $J = 7.5$  Hz, ArCH), 3.24 (s, 3H,  $\text{CH}_3$ ).

3-(2-azidobenzylidene)-1-phenylindolin-2-one (**1c**): Yellow solid;  $^1\text{H}$  NMR (400 MHz,  $\text{CDCl}_3$ ):  $\delta = 7.92$  (s, 1H, CH), 7.74 (d, 1H,  $J = 7.6$  Hz, ArCH), 7.54-7.41 (m, 7H, ArCH), 7.29 (d, 1H,  $J = 8.0$  Hz, ArCH), 7.24 (t, 1H,  $J = 7.2$  Hz, ArCH), 7.18 (t, 1H,  $J = 7.6$  Hz, ArCH), 6.88 (t, 1H,  $J = 7.6$  Hz, ArCH), 6.81 (d, 1H,  $J = 7.6$  Hz, ArCH).

3-(2-azidobenzylidene)-5-chloroindolin-2-one (**1d**): Pale yellow solid;  $^1\text{H}$  NMR (400 MHz,  $\text{CDCl}_3$ ):  $\delta = 9.12$  (s, 1H, NH), 7.87 (s, 1H, CH), 7.68 (d, 1H,  $J = 7.6$  Hz, ArCH), 7.52 (t, 1H,  $J = 7.6$  Hz, ArCH), 7.38 (d, 1H,  $J = 1.6$  Hz, ArCH), 7.31-7.24 (m, 2H, ArCH), 7.19 (dd, 1H,  $J = 8.0$  Hz, 2.0 Hz, ArCH), 6.86 (d, 1H,  $J = 8.4$  Hz, ArCH).

3-(2-azido-4,5-dimethoxybenzylidene)-1-methylindolin-2-one (**1e**): Pale yellow solid;  $^1\text{H}$  NMR (400 MHz,  $\text{CDCl}_3$ ):  $\delta = 9.09$  (s, 1H, CH), 7.87 (s, 1H, ArCH), 7.54 (d, 1H,  $J = 7.6$  Hz, ArCH), 7.29 (d, 1H,  $J = 8.0$  Hz, ArCH), 7.06 (t, 1H,  $J = 7.6$  Hz, ArCH), 6.91 (t, 1H,  $J = 8.0$  Hz, ArCH), 6.73 (s, 1H, ArCH), 3.98 (s, 3H,  $\text{OCH}_3$ ), 4.02 (s, 3H,  $\text{OCH}_3$ ), 3.28 (s, 3H, N- $\text{CH}_3$ ).

3-(2-azido-4,5-dimethoxybenzylidene)-1-phenylindolin-2-one (**1f**): Pale yellow solid;  $^1\text{H}$  NMR (400 MHz,  $\text{CDCl}_3$ ):  $\delta$  = 8.99 (s, 1H, CH), 7.98 (s, 1H, ArCH), 7.64 (d, 1H,  $J$  = 7.6 Hz, ArCH), 7.53 (t, 2H,  $J$  = 7.6 Hz, ArCH), 7.46-7.41 (m, 3H, ArCH), 7.18 (t, 1H,  $J$  = 7.6 Hz, ArCH), 7.09 (t, 1H,  $J$  = 7.6 Hz, ArCH), 6.76 (d, 1H,  $J$  = 8.0 Hz, ArCH), 6.66 (s, 1H, ArCH), 3.97 (s, 3H,  $\text{OCH}_3$ ), 3.95 (s, 3H,  $\text{OCH}_3$ ).

Ethyl 4-azido-3-((1-methyl-2oxoindolin-3-ylidene)methyl)benzoate (**1g**): Pale yellow solid;  $^1\text{H}$  NMR (400 MHz,  $\text{CDCl}_3$ ):  $\delta$  = 8.39 (s, 1H, CH), 8.13 (d, 1H,  $J$  = 7.6 Hz, ArCH), 7.78 (s, 1H, ArCH), 7.36-7.27 (m, 3H, ArCH), 6.87 (d, 1H,  $J$  = 7.6 Hz, ArCH), 6.83 (d, 1H,  $J$  = 8.0 Hz, ArCH), 4.37 (q, 2H,  $J$  = 7.2 Hz,  $\text{CH}_2$ ), 3.28 (s, 3H,  $\text{CH}_3$ ), 1.37 (t, 3H,  $J$  = 7.2 Hz,  $\text{CH}_3$ ).

Methyl 4-azido-3-((2-oxo-1-phenylindolin-3-ylidene)methyl)benzoate (**1h**): yellow solid;  $^1\text{H}$  NMR (400 MHz,  $\text{CDCl}_3$ ):  $\delta$  = 8.43 (d, 1H,  $J$  = 1.6 Hz, ArCH), 8.16 (dd, 1H,  $J$  = 1.6 Hz, 8.4 Hz, ArCH), 7.86 (s, 1H, CH), 7.55 (t, 2H,  $J$  = 7.6 Hz, ArCH), 7.47-7.34 (m, 5H, ArCH), 7.20 (t, 1H,  $J$  = 7.6 Hz, ArCH), 6.90 (t, 1H,  $J$  = 7.6 Hz, ArCH), 6.83 (d, 1H,  $J$  = 8.0 Hz, ArCH), 3.93 (s, 3H,  $\text{CH}_3$ ).

3-(2-azido-4-chlorobenzylidene)-1-phenylindolin-2-one (**1i**): Pale yellow solid;  $^1\text{H}$  NMR (400 MHz,  $\text{CDCl}_3$ ):  $\delta$  = 7.85 (s, 1H, CH), 7.77 (d, 1H,  $J$  = 8.1 Hz, ArCH), 7.56-7.39 (m, 8H, ArCH), 7.19 (t, 2H,  $J$  = 7.5 Hz, ArCH), 6.82 (d, 1H,  $J$  = 7.8 Hz, ArCH).

Ethyl-4-(2-azidobenzylidene)-4,5-dihydro-1,2-dimethyl-5-oxo-1*H*-pyrrole-3-carboxylate (**2a**): Pale yellow solid.  $^1\text{H}$  NMR (300 MHz,  $\text{CDCl}_3$ ):  $\delta$  = 8.22 (s, 1H, CH), 8.11 (d, 1H,  $J$  = 8.1 Hz, ArCH), 7.90 (d, 1H,  $J$  = 7.5 Hz, ArCH), 7.39-7.31 (m, 2H, ArCH), 4.33 (q, 2H,  $J$  = 6.9 Hz,  $\text{CH}_2$ ), 3.12 (s, 3H, N- $\text{CH}_3$ ), 2.53 (s, 3H,  $\text{CH}_3$ ), 1.40 (t,  $J$  = 6.9 Hz, 3H,  $\text{CH}_3$ ).

Ethyl-4-(2-azidobenzylidene)-4,5-dihydro-2-methyl-5-oxo-1-phenyl-1*H*-pyrrole-3-carboxylate (**2b**): Yellow solid.  $^1\text{H}$  NMR (400 MHz,  $\text{CDCl}_3$ ):  $\delta$  = 8.34 (s, 1H, CH), 8.17



(d, 1H,  $J = 7.6$  Hz, ArCH), 7.46 (t, 3H,  $J = 8.0$  Hz, ArCH), 7.41 (d, 2H,  $J = 7.2$  Hz, ArCH), 7.37 (t, 1H,  $J = 7.6$  Hz, ArCH), 7.18 (d, 1H,  $J = 8.0$  Hz, ArCH), 7.09 (t, 1H,  $J = 7.6$  Hz, ArCH), 4.37 (q, 2H,  $J = 7.2$  Hz, CH<sub>2</sub>), 2.35 (s, 3H, CH<sub>3</sub>), 1.41 (t, 3H, CH<sub>3</sub>).

Ethyl-4-(2-azido-4-chlorobenzylidene)-4,5-dihydro-2-methyl-5-oxo-1-phenyl-1*H*-pyrrole-3-carboxylate (**2c**): Yellow solid. <sup>1</sup>H NMR (400 MHz, CDCl<sub>3</sub>):  $\delta = 8.41$  (d, 1H,  $J = 8.4$  Hz, ArCH), 8.34 (s, 1H, CH), 8.28 (s, 1H, ArCH), 8.20 (d, 1H,  $J = 8.4$  Hz, ArCH), 7.50-7.40 (m, 5H, ArCH), 4.37 (q, 2H,  $J = 6.8$  Hz, CH<sub>2</sub>), 2.34 (s, 3H, CH<sub>3</sub>), 1.41 (t, 3H,  $J = 6.8$  Hz, CH<sub>3</sub>).

4-(2-azidobenzylidene)-3-methyl-1-phenyl-1*H*-pyrazol-5(4*H*)-one (**3a**): Red solid; <sup>1</sup>H NMR (400 MHz, CDCl<sub>3</sub>):  $\delta = 9.09$  (d, 1H,  $J = 8.0$  Hz, ArCH), 7.93 (d, 2H,  $J = 8.0$  Hz, ArCH), 7.77 (s, 1H, CH), 7.54 (t, 1H,  $J = 7.6$  Hz, ArCH), 7.39 (t, 2H,  $J = 7.6$  Hz, ArCH), 7.27-7.16 (m, 3H, ArCH), 2.35 (s, 3H, CH<sub>3</sub>).

4-(2-azidobenzylidene)-1,3-diphenyl-1*H*-pyrazol-5(4*H*)-one (**3b**): Red solid; <sup>1</sup>H NMR (400 MHz, CDCl<sub>3</sub>):  $\delta = 8.98$  (d, 1H,  $J = 8.0$  Hz, ArCH), 8.01-8.04 (m, 3H, ArCH), 7.69-7.72 (m, 2H, ArCH), 7.52-7.56 (m, 3H, ArCH), 7.42 (t, 2H,  $J = 8.0$  Hz, ArCH), 7.35 (s, 1H, CH), 7.25 (d, 1H,  $J = 6.4$  Hz, ArCH), 7.20 (t, 2H,  $J = 4$  Hz, ArCH).

4-(2-azidobenzylidene)-2-phenylisoquinoline-1,3(2*H*,4*H*)-dione (**4**): Yellow solid. <sup>1</sup>H NMR (300 MHz, CDCl<sub>3</sub>):  $\delta = 8.27$  (d, 1H,  $J = 7.8$  Hz, ArCH), 8.21 (s, 1H, CH), 7.55-7.41 (m, 6H, ArCH), 7.36 (t, 2H,  $J = 6.9$  Hz, ArCH), 7.34-7.25 (m, 3H, ArCH), 7.12 (t, 1H,  $J = 7.5$  Hz, ArCH).

5-(2-azidobenzylidene)-1,3-dimethylpyrimidine-2,4,6(1*H*,3*H*,5*H*)-trione (**5**): Pale yellow solid. <sup>1</sup>H NMR (300 MHz, CDCl<sub>3</sub>):  $\delta = 8.68$  (s, 1H, CH), 7.88 (d, 1H,  $J = 7.8$  Hz, ArCH), 7.52 (t, 1H,  $J = 7.8$  Hz, ArCH), 7.25 (t, 1H,  $J = 7.5$  Hz, ArCH), 7.18 (d, 1H,  $J = 7.5$  Hz, ArCH), 3.31 (s, 3H, CH<sub>3</sub>), 3.33 (s, 3H, CH<sub>3</sub>).

## Analytical data for compounds (6a-6i, 8a-8b, 7a-7c, 9, 10)

5*H*-indolo[3,2-*c*]quinolin-6(11*H*)-one (**6a**): Yellow solid; mp > 360 °C; <sup>1</sup>H NMR (400 MHz, DMSO-*d*<sub>6</sub>): δ = 12.56 (s, 1H, NH), 11.43 (s, 1H, NH), 8.18 (d, 2H, *J* = 7.5 Hz, ArCH), 7.60 (d, 2H, *J* = 7.8 Hz, ArCH), 7.22-7.52 (m, 4H, ArCH); <sup>13</sup>C NMR (100 MHz, DMSO-*d*<sub>6</sub>): δ = 160.3, 141.2, 138.4, 138.2, 129.6, 124.8, 124.4, 122.6, 122.0, 121.5, 121.2, 116.5, 112.4, 112.1, 106.9; MS (EI-*m/z*): 234 (M<sup>+</sup>, 100); HRMS Calcd for C<sub>15</sub>H<sub>10</sub>N<sub>2</sub>O (M+1)<sup>+</sup> 235.0866, Found 235.0860.

5-methyl-5*H*-indolo[3,2-*c*]quinolin-6(11*H*)-one (**6b**): Yellow solid; mp > 360 °C; <sup>1</sup>H NMR (400 MHz, DMSO-*d*<sub>6</sub>): δ = 12.59 (s, 1H, NH), 8.22-8.30 (m, 2H, ArCH), 7.61-7.66 (m, 3H, ArCH), 7.35-7.40 (m, 2H, ArCH), 7.27 (t, 1H, *J* = 7.5 Hz, ArCH), 3.73 (s, 3H, CH<sub>3</sub>); <sup>13</sup>C NMR (100 MHz, DMSO-*d*<sub>6</sub>): δ = 159.5, 140.1, 139.1, 138.2, 130.1, 125.0, 124.6, 123.0, 122.1, 121.6, 121.3, 116.1, 113.3, 112.1, 106.3, 28.9; MS (EI-*m/z*): 248 (M<sup>+</sup>, 100); HR MS Calcd for C<sub>16</sub>H<sub>12</sub>N<sub>2</sub>O (M+1)<sup>+</sup> 249.1022, Found 249.1025.

5-phenyl-5*H*-indolo[3,2-*c*]quinolin-6(11*H*)-one (**6c**): Yellow solid; mp > 360 °C; <sup>1</sup>H NMR (400 MHz, DMSO-*d*<sub>6</sub>): δ = 12.85 (s, 1H, NH), 8.31 (dd, 1H, *J* = 1.2, 7.6 Hz, ArCH), 8.17 (d, 1H, *J* = 8.4 Hz, ArCH), 7.64-7.70 (m, 4H, ArCH), 7.59 (d, 1H, *J* = 7.6 Hz, ArCH), 7.30-7.44 (m, 5H, ArCH), 6.64 (d, 1H, *J* = 8.4 Hz, ArCH); <sup>13</sup>C NMR (100 MHz, DMSO-*d*<sub>6</sub>): δ = 158.6, 139.7, 139.4, 137.8, 137.4, 129.4, 129.4, 129.3, 129.3, 128.7, 127.9, 124.1, 123.7, 122.1, 121.4, 120.7, 120.2, 115.9, 112.2, 111.3, 105.4; MS (EI-*m/z*): 310 (M<sup>+</sup>, 100); HRMS Calcd for C<sub>21</sub>H<sub>14</sub>N<sub>2</sub>O (M+1)<sup>+</sup> 311.1179, Found 311.1175.

2-chloro-5*H*-indolo[3,2-*c*]quinolin-6(11*H*)-one (**6d**): Dark yellow solid; mp: 293-295 °C. <sup>1</sup>H NMR (300 MHz, DMSO-*d*<sub>6</sub>): δ = 12.64 (s, 1H, NH), 11.60 (s, 1H, NH), 8.33 (s, 1H, ArCH), 8.20 (d, 1H, *J* = 7.5 Hz, ArCH), 7.63 (d, 1H, *J* = 7.8 Hz, ArCH), 7.54 (d,

1H,  $J = 8.7$  Hz, ArCH), 7.46 (d, 1H,  $J = 8.7$  Hz, ArCH), 7.39 (t, 1H,  $J = 7.5$  Hz, ArCH), 7.28 (t, 1H,  $J = 7.5$  Hz, ArCH);  $^{13}\text{C}$  NMR (100 MHz, DMSO- $d_6$ ):  $\delta = 160.1, 139.9, 138.2, 137.1, 129.4, 125.9, 124.8, 124.6, 121.9, 121.7, 121.3, 118.3, 113.7, 112.3, 107.5$ ; MS (EI- $m/z$ ): 268 ( $\text{M}^+$ , 100); HRMS Calcd for  $\text{C}_{15}\text{H}_9\text{ClN}_2\text{O}$  ( $\text{M}+1$ ) $^+$  269.0476, Found 269.0481.

8,9-dimethoxy-5-methyl-5*H*-indolo[3,2-*c*]quinolin-6(11*H*)-one (**6e**): Yellow solid mp: 230-232 °C;  $^1\text{H}$  NMR (400 Hz, DMSO- $d_6$ ):  $\delta = 12.31$  (s, 1H, NH), 8.20 (d, 1H,  $J = 7.6$  Hz, ArCH), 7.70 (s, 1H, ArCH), 7.56-7.58 (m, 2H, ArCH), 7.35 (t, 1H, ArCH), 7.10 (s, 1H, ArCH), 3.87 (s, 3H, OCH<sub>3</sub>), 3.85 (s, 3H, OCH<sub>3</sub>), 3.72 (s, 3H, CH<sub>3</sub>);  $^{13}\text{C}$  NMR (100 MHz, DMSO- $d_6$ ):  $\delta = 159.1, 148.2, 145.6, 138.1, 137.9, 132.3, 128.7, 122.0, 121.6, 117.2, 115.6, 113.3, 106.1, 102.7, 95.2, 55.8, 55.7, 28.4$ ; MS (EI- $m/z$ ): 308 ( $\text{M}^+$ , 100); HRMS Calcd for  $\text{C}_{18}\text{H}_{16}\text{N}_2\text{O}_3$  ( $\text{M}+1$ ) $^+$  309.1234, Found 309.1228.

8,9-dimethoxy-5-phenyl-5*H*-indolo[3,2-*c*]quinolin-6(11*H*)-one (**6f**): Dark yellow solid; mp: 200-203 °C;  $^1\text{H}$  NMR (400 Hz, DMSO- $d_6$ ):  $\delta = 12.50$  (s, 1H, NH), 8.25 (m, 1H, ArCH), 7.65 (m, 3H, ArCH), 7.57 (t, 1H,  $J = 7.2$  Hz, ArCH), 7.35 (m, 4H, ArCH), 7.17 (s, 1H, ArCH), 6.62 (d, 1H,  $J = 8.0$  Hz, ArCH), 3.90 (s, 3H, OCH<sub>3</sub>), 3.82 (s, 3H, OCH<sub>3</sub>);  $^{13}\text{C}$  NMR (100 MHz, DMSO- $d_6$ ):  $\delta = 158.7, 147.8, 145.3, 138.7, 138.1, 137.9, 131.9, 129.4, 129.4, 129.3, 129.3, 127.9, 127.8, 121.4, 121.3, 116.7, 115.9, 112.6, 105.7, 102.1, 94.8, 55.2, 55.2$ ; MS (EI- $m/z$ ): 370 ( $\text{M}^+$ , 100); HRMS Calcd for  $\text{C}_{23}\text{H}_{18}\text{N}_2\text{O}_3$  ( $\text{M}+1$ ) $^+$  371.1390, Found 371.1395.

Ethyl 6, 11-dihydro-5-methyl-6-oxo-5*H*-indolo[3,2-*c*]quinoline-8-carboxylate (**6g**) : White solid; mp: 310-312 °C;  $^1\text{H}$  NMR (400 Hz, CD<sub>3</sub>COCD<sub>3</sub>):  $\delta = 8.98$  (d, 1H,  $J = 1.2$  Hz, ArCH), 8.34 (d, 1H,  $J = 7.6$  Hz, ArCH), 8.03 (dd, 1H,  $J = 8.8, 1.6$  Hz, ArCH), 7.73 (d, 1H,  $J = 8.8$  Hz, ArCH), 7.42-7.70 (m, 3H, ArCH), 4.40 (q, 2H,  $J = 7.2$  Hz, CH<sub>2</sub>), 3.81 (s, 3H, CH<sub>3</sub>), 1.42 (t, 3H,  $J = 7.2$  Hz, CH<sub>2</sub>CH<sub>3</sub>);  $^{13}\text{C}$  NMR (100 MHz, CD<sub>3</sub>COCD<sub>3</sub>):  $\delta = 176.1, 168.6, 150.8, 150.2, 148.8, 139.8, 134.8, 134.0, 132.6, 132.5$ ,

13 1.4, 125.3, 122.4, 121.1, 116.2, 70.0, 38.8, 23.7; MS (EI- $m/z$ ): 320 ( $M^+$ , 100); HRMS Calcd for  $C_{19}H_{16}N_2O_3$  ( $M+1$ )<sup>+</sup> 321.1234, Found 321.1241.

Methyl 6,11-dihydro-6-oxo-5-phenyl-5*H*-indolo[3,2-*c*]quinoline-8-carboxylate (**6h**): White solid; mp: 338-340 °C; <sup>1</sup>H NMR (400MHz, CD<sub>3</sub>COCD<sub>3</sub>): δ = 8.95 (d, 1H, *J* = 1.2 Hz, Ar CH), 8.39 (dd, 1H, *J* = 8.0, 1.2 Hz, ArCH), 8.06 (dd, 1H, *J* = 8.8, 1.6 Hz, Ar CH), 7.80 (d, 1H, *J* = 8.4 Hz, ArCH), 7.70 (t, 2H, *J* = 8.0 Hz, ArCH), 7.62 (t, 1H, *J* = 7.2 Hz, Ar CH), 7.41-7.51 (m, 4H, ArCH), 3.92 (s, 3H, CH<sub>3</sub>); <sup>13</sup>C NMR (100MHz, CD<sub>3</sub>COCD<sub>3</sub>): δ = 166.8, 153.4, 104.5, 140.2, 138.1, 129.8, 129.8, 129.4, 129.4, 129.3, 129.3, 128.3, 125.0, 122.9, 122.7, 122.5, 121.8, 121.8, 116.4, 112.4, 111.5, 107.1, 51.3; MS (EI- $m/z$ ): 368 ( $M^+$ , 26); HRMS Calcd for  $C_{23}H_{16}N_2O_3$  ( $M+1$ )<sup>+</sup> 369.1234, Found 369.1239.

9-chloro-5-phenyl-5*H*-indolo[3,2-*c*]quinolin-6(11*H*)-one (**6i**): Yellow solid; mp: 225 - 227 °C; <sup>1</sup>H NMR (400MHz, DMSO-*d*<sub>6</sub>): δ = 12.85 (s, 1H, NH), 8.32 (dd, 1H, *J* = 7.6, 1.2 Hz, ArCH), 8.13 (d, 1H, *J* = 8.4 Hz, ArCH), 7.69-7.66 (m, 3H, ArCH), 7.59 (d, 1H, *J* = 7.6 Hz, ArCH), 7.44-7.42 (m, 1H, ArCH), 7.38 (d, 3H, *J* = 7.6 Hz, ArCH), 7.31 (dd, 1H, *J* = 8.4, 2.0 Hz, ArCH), 6.64 (d, 1H, *J* = 8.4 Hz, ArCH); <sup>13</sup>C NMR (100MHz, DMSO-*d*<sub>6</sub>): δ = 158.4, 140.6, 139.6, 38.0, 137.7, 129.5, 129.5, 129.3, 129.3, 129.1, 128.3, 128.1, 123.0, 122.2, 121.6, 121.4, 121.2, 116.1, 112.1, 111.1, 105.4; MS (EI- $m/z$ ): 344 ( $M^+$ , 60); HRMS Calcd for  $C_{21}H_{13}ClN_2O$  ( $M+1$ )<sup>+</sup> 345.0789, Found 345.0783.

Ethyl 2,5-dihydro-2,3-dimethyl-1-oxo-1*H*-pyrido[4,3-*b*]indole-4-carboxylate (**7a**): White solid; mp: 162-164 °C; <sup>1</sup>H NMR (400MHz, DMSO-*d*<sub>6</sub>): δ = 11.27 (s, 1H, NH), 8.13 (d, 1H, *J* = 7.6 Hz, ArCH), 7.65 (d, 1H, *J* = 8.0 Hz, ArCH), 7.33-7.29 (m, 1H, ArCH), 7.21 (t, 1H, *J* = 7.6 Hz, ArCH), 4.44 (q, 2H, *J* = 7.2 Hz, CH<sub>2</sub>), 3.62 (s, 3H, N-CH<sub>3</sub>), 2.76 (s, 3H, CH<sub>3</sub>), 1.38 (t, 3H, *J* = 7.2 Hz, CH<sub>3</sub>); <sup>13</sup>C NMR (100MHz, DMSO-*d*<sub>6</sub>): δ = 165.0, 158.1, 150.4, 140.7, 137.1, 123.3, 123.1, 120.3, 119.6, 111.5, 103.6, 98.7, 60.4, 29.8, 18.0, 13.7; MS (EI- $m/z$ ): 284 ( $M^+$ , 64); HRMS Calcd for  $C_{16}H_{16}N_2O_3$  ( $M+1$ )<sup>+</sup> 285.1234, Found 285.1236.

Ethyl.2,5-dihydro-3-methyl-1-oxo-2-phenyl-1*H*-pyrido[4,3-*b*]indole-4-carboxylate (**7b**): White solid; mp: 216-219 °C; <sup>1</sup>H NMR (300MHz, CDCl<sub>3</sub>): δ = 10.07 (s, 1H, NH), 8.28 (d, 1H, *J* = 10.5Hz, ArCH), 7.53 (d, 2H, *J* = 8.1Hz, ArCH), 7.50-7.45 (m, 2H, ArCH), 7.35 (t, 1H, *J* = 6.9Hz, ArCH), 7.30 (dd, 2H, *J* = 6.9, 8.1Hz, ArCH), 7.24 (d, 1H, *J* = 6.0Hz, ArCH), 4.47 (q, 2H, *J* = 7.2Hz, CH<sub>2</sub>), 2.47 (s, 3H, CH<sub>3</sub>), 1.45 (t, 3H, *J* = 7.2Hz, CH<sub>3</sub>); <sup>13</sup>C NMR (100MHz, CDCl<sub>3</sub>): δ = 166.6, 160.0, 151.5, 142.8, 139.1, 136.9, 130.0, 128.8, 128.6, 124.5, 124.2, 121.8, 121.5, 110.8, 105.9, 99.4, 61.4, 21.2, 14.4; MS (EI-*m/z*): 346 (M<sup>+</sup>, 28); HRMS Calcd for C<sub>21</sub>H<sub>18</sub>N<sub>2</sub>O<sub>3</sub> (M +1)<sup>+</sup> 347.1390, Found 347.1393.

Ethyl.7-chloro-2,5-dihydro-3-methyl-1-oxo-2-phenyl-1*H*-pyrido[4,3-*b*]indole-4-carboxylate (**7c**): White solid; mp: 167-169 °C; <sup>1</sup>H NMR (400MHz, DMSO-*d*<sub>6</sub>): δ = 11.57 (s, 1H, NH), 8.00 (d, 1H, *J* = 8.4Hz, ArCH), 7.73 (d, 1H, *J* = 1.6Hz, ArCH), 7.60-7.56 (m, 2H, ArCH), 7.53-7.50 (m, 1H, ArCH), 7.35 (d, 2H, *J* = 7.2Hz, ArCH), 7.27-7.24 (m, 1H, ArCH), 4.46 (q, 2H, *J* = 7.2Hz, CH<sub>2</sub>), 2.34 (s, 3H, CH<sub>3</sub>), 1.38 (t, 3H, *J* = 7.2Hz, CH<sub>3</sub>); <sup>13</sup>C NMR (100MHz, DMSO-*d*<sub>6</sub>): δ = 164.7, 158.2, 150.5, 142.0, 138.3, 137.7, 129.0, 129.0, 128.4, 128.4, 128.1, 127.8, 122.0, 120.9, 120.6, 111.5, 104.0, 98.7, 60.6, 20.0, 13.7; MS (EI-*m/z*): 380 (M<sup>+</sup>, 5); HRMS Calcd for C<sub>21</sub>H<sub>17</sub>ClN<sub>2</sub>O<sub>3</sub> (M +1)<sup>+</sup> 381.1000, Found 381.1005.

4-methyl-2-phenyl-2*H*-pyridazino[4,5-*b*]indol-1(5*H*)-one (**8a**): Pale yellow solid; mp: 280-282 °C; <sup>1</sup>H NMR (400MHz, DMSO-*d*<sub>6</sub>): δ = 12.50 (s, 1H, NH), 8.22 (d, 1H, *J* = 8.0 Hz, ArCH), 7.71 (d, 1H, *J* = 8.0Hz, ArCH), 7.60 (d, 2H, *J* = 7.6Hz, ArCH), 7.51 (t, 3H, *J* = 7.6Hz, ArCH), 7.42-7.34 (m, 2H, ArCH), 2.63 (s, 3H, CH<sub>3</sub>); <sup>13</sup>C NMR (100 MHz, DMSO-*d*<sub>6</sub>): δ = 157.4, 141.6, 137.8, 136.0, 135.4, 127.8, 127.8, 126.6, 125.9, 125.9, 125.8, 122.3, 121.3, 121.1, 112.2, 110.4, 16.9; MS (EI-*m/z*): 275 (M<sup>+</sup>, 87); HRMS Calcd for C<sub>17</sub>H<sub>13</sub>N<sub>3</sub>O (M+1)<sup>+</sup> 276.1131, Found 276.1127.

2,4-diphenyl-2*H*-pyridazino[4,5-*b*]indol-1(5*H*)-one (**8b**): Yellow solid; mp: 229-232 °C; <sup>1</sup>H NMR (400MHz, DMSO-*d*<sub>6</sub>): δ = 12.28 (s, 1H, NH), 8.28 (d, 1H, *J* = 7.6Hz, ArCH), 7.93-7.90 (m, 2H, ArCH), 7.74-7.71 (m, 3H, ArCH), 7.63-7.59 (m, 3H, ArCH), 7.53 (t, 3H, *J* = 7.6Hz, ArCH), 7.44 (d, 1H, *J* = 7.6Hz, ArCH), 7.37 (d, 1H, *J* = 8.0Hz, ArCH); <sup>13</sup>C NMR (100MHz, DMSO-*d*<sub>6</sub>): δ = 157.2, 141.5, 138.5, 137.0, 134.2, 133.2, 129.0, 128.5, 128.5, 127.9, 127.9, 127.8, 127.8, 126.9, 126.0, 125.9, 125.9, 122.3, 121.5, 121.0, 112.6, 111.6; MS (EI-*m/z*): 337 (M<sup>+</sup>, 39); HRMS Calcd for C<sub>22</sub>H<sub>15</sub>N<sub>3</sub>O (M +1)<sup>+</sup> 338.1288, Found 338.1285.

2-phenylbenzo[*e*]azepino[4,3-*b*]indole-1,3(2*H*,6*H*)-dione (**9**): White solid; mp: 180-182 °C; <sup>1</sup>H NMR (400MHz, CDCl<sub>3</sub>): δ = 10.05 (s, 1H, NH), 8.39 (d, 1H, *J* = 8.0Hz, ArCH), 8.24 (dd, 1H, *J* = 8.0, 1.2Hz, ArCH), 7.79 (d, 1H, *J* = 7.6Hz, ArCH), 7.60 - 7.56 (m, 1H, ArCH), 7.50-7.20 (m, 9H, ArCH); <sup>13</sup>C NMR (100MHz, CDCl<sub>3</sub>): δ = 168.9, 163.8, 140.3, 136.9, 136.1, 134.1, 132.8, 132.8, 132.5, 129.6, 129.4, 129.4, 128.4, 128.4, 128.3, 128.1, 127.1, 125.1, 125.0, 122.7, 111.3, 109.3; MS (EI-*m/z*): 338 (M<sup>+</sup>, 65); HRMS Calcd for C<sub>22</sub>H<sub>14</sub>N<sub>2</sub>O<sub>2</sub> (M +1)<sup>+</sup> 339.1128, Found 339.1122.

2,4-dimethyl-[1,3]diazepino[5,6-*b*]indole-1,3,5(2*H*,4*H*,6*H*)-trione (**10**): White solid; mp: 267-269 °C; <sup>1</sup>H NMR (400MHz, DMSO-*d*<sub>6</sub>): δ = 12.86 (s, 1H, NH), 8.37 (d, 1H, *J* = 8.0Hz, ArCH), 7.60 (d, 1H, *J* = 8.0Hz, ArCH), 7.46-7.43 (m, 1H, ArCH), 7.33 (t, 1H, *J* = Hz, ArCH), 3.44 (s, 3H, CH<sub>3</sub>), 3.43 (s, 3H, CH<sub>3</sub>); <sup>13</sup>C NMR (100MHz, DMSO-*d*<sub>6</sub>): δ = 160.4, 157.4, 150.5, 136.0, 132.1, 129.3, 126.0, 125.9, 122.6, 112.6, 108.4, 34.1, 34.0; MS (EI-*m/z*): 257 (M<sup>+</sup>, 60); HRMS Calcd for C<sub>13</sub>H<sub>11</sub>N<sub>3</sub>O<sub>3</sub> (M +1)<sup>+</sup> 258.0873, Found 258.0878.

### $^1\text{H}$ NMR of **6a**.

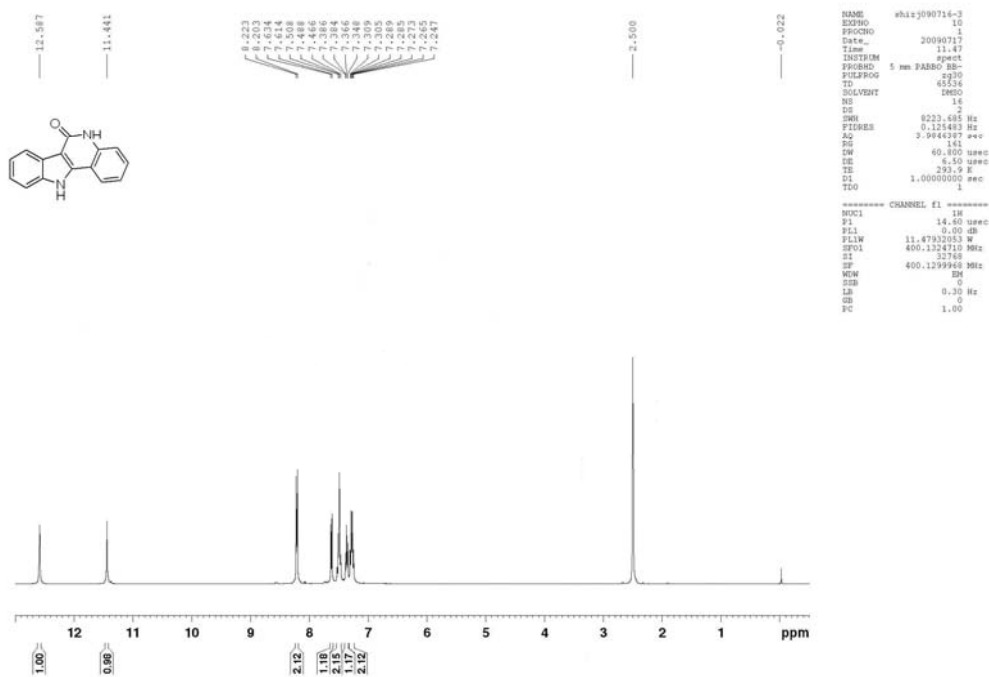

### $^{13}\text{C}$ NMR of **6a**

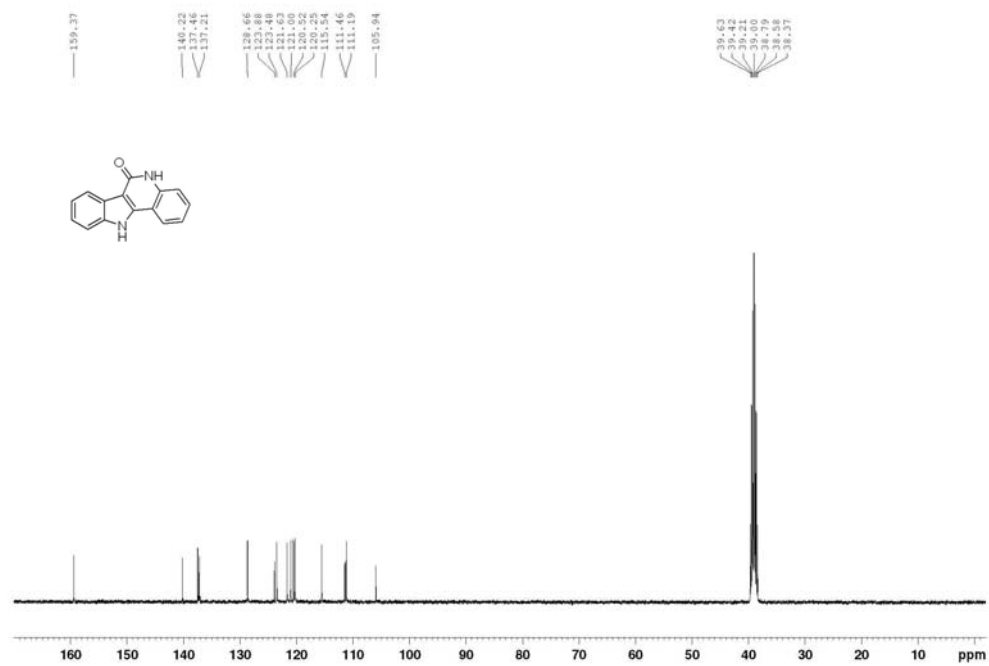

$^1\text{H}$  NMR of **6b**.

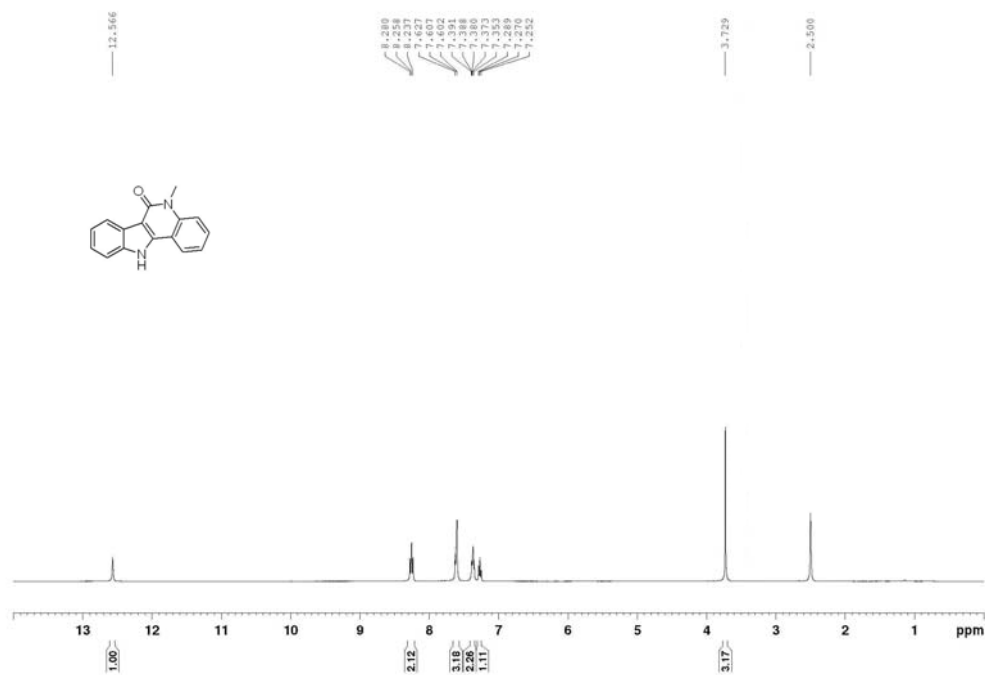

$^{13}\text{C}$  NMR of **6b**

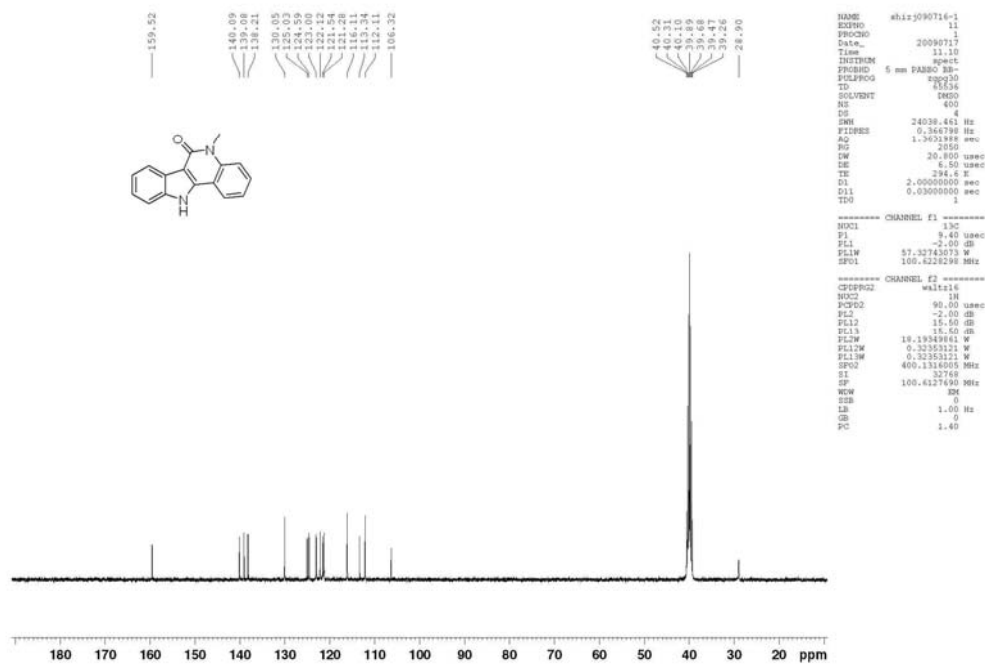



$^1\text{H}$  NMR of **6c**.

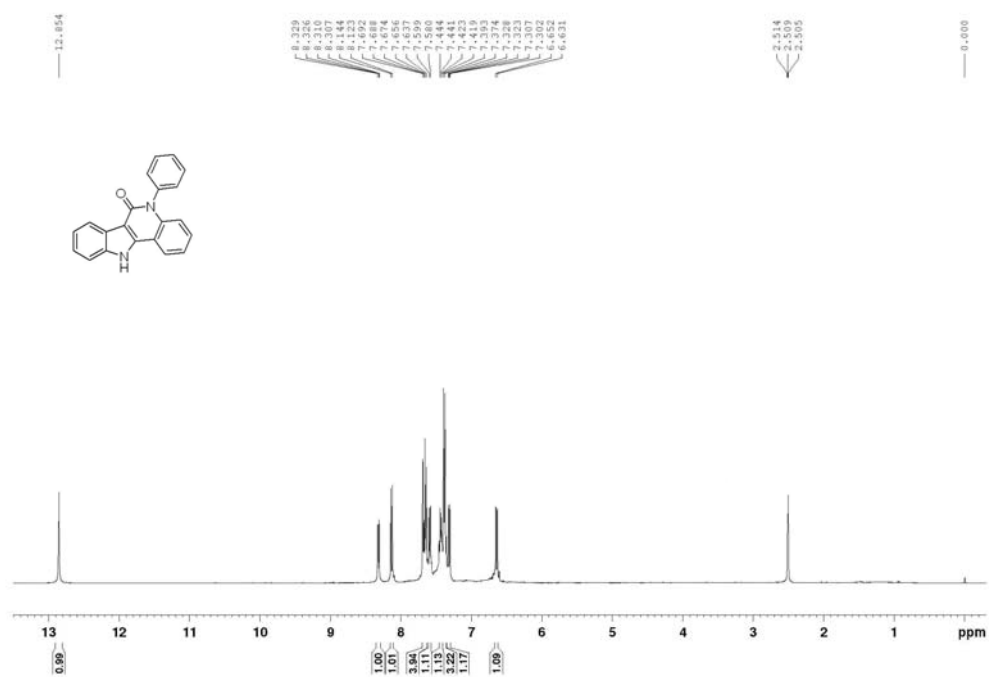

$^{13}\text{C}$  NMR of **6c**

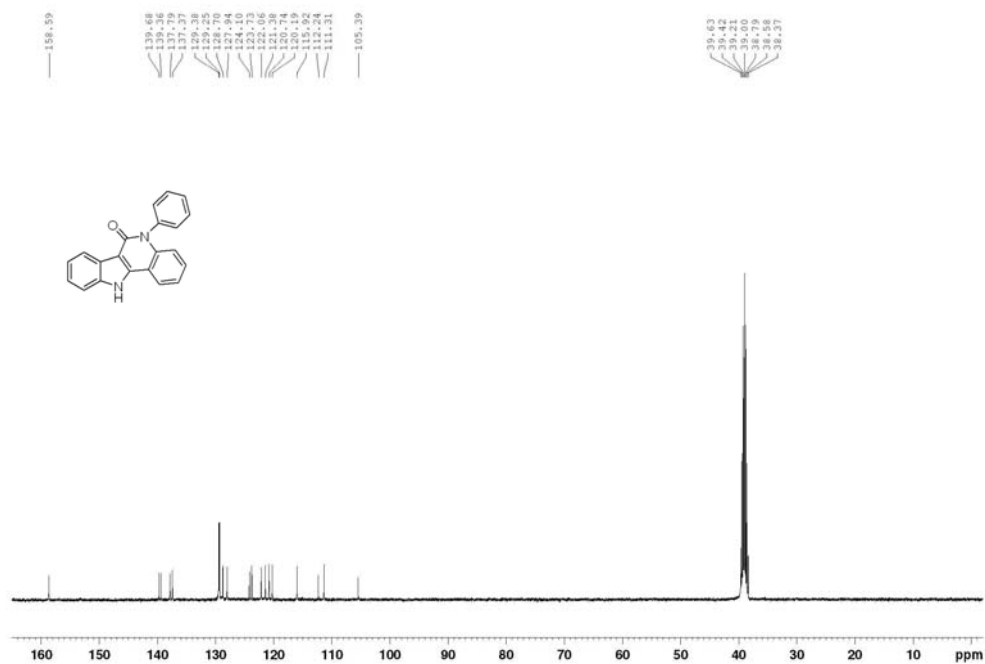

$^1\text{H}$  NMR of **6d**.

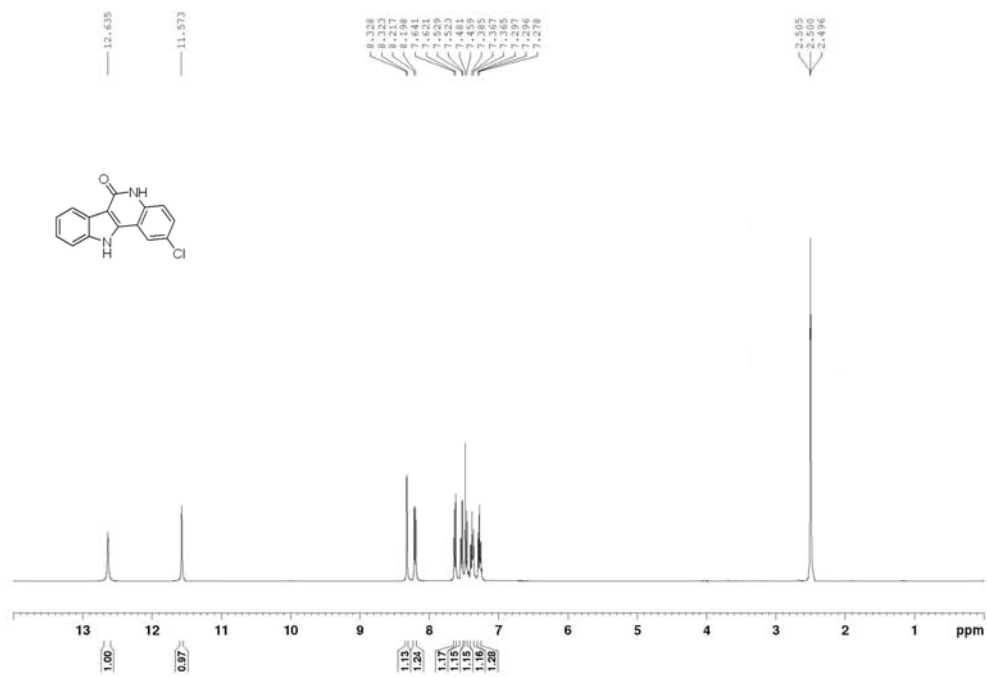

$^{13}\text{C}$  NMR of **6d**

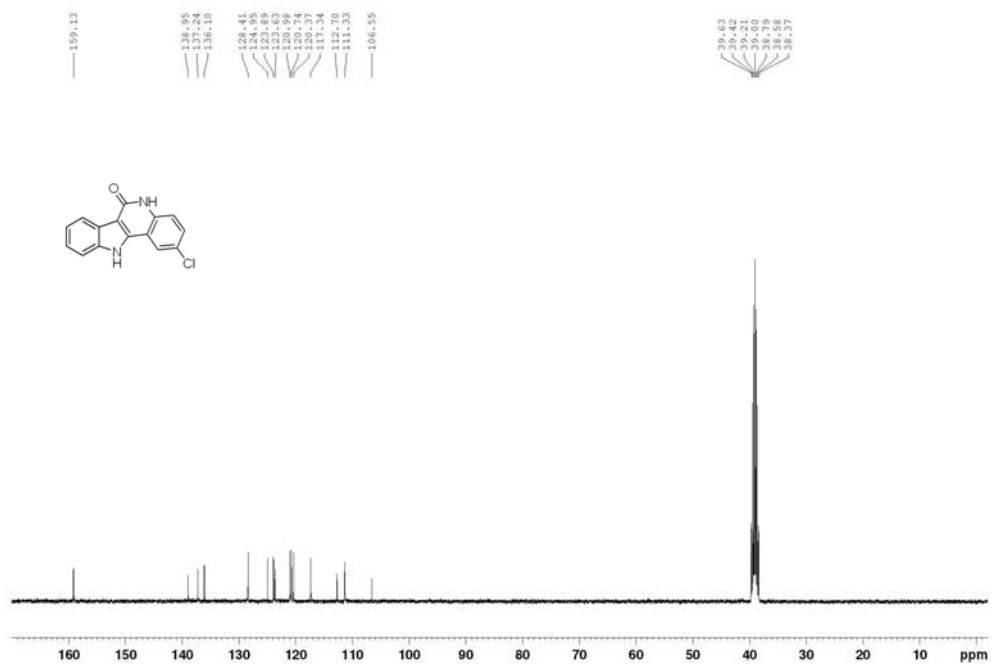

$^1\text{H}$  NMR of **6e**.

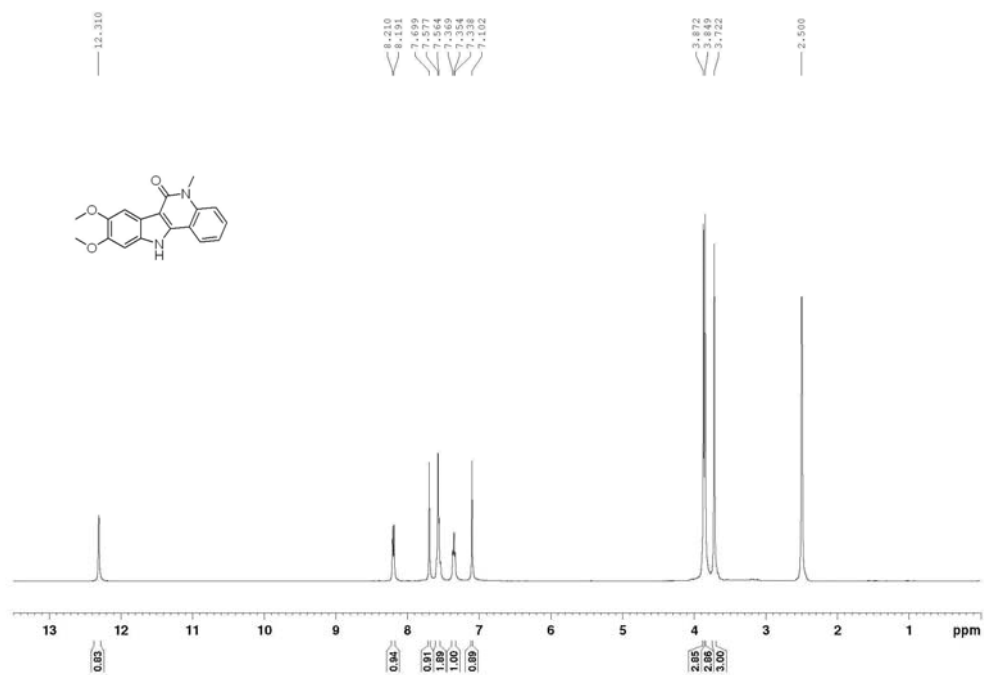

$^{13}\text{C}$  NMR of **6e**

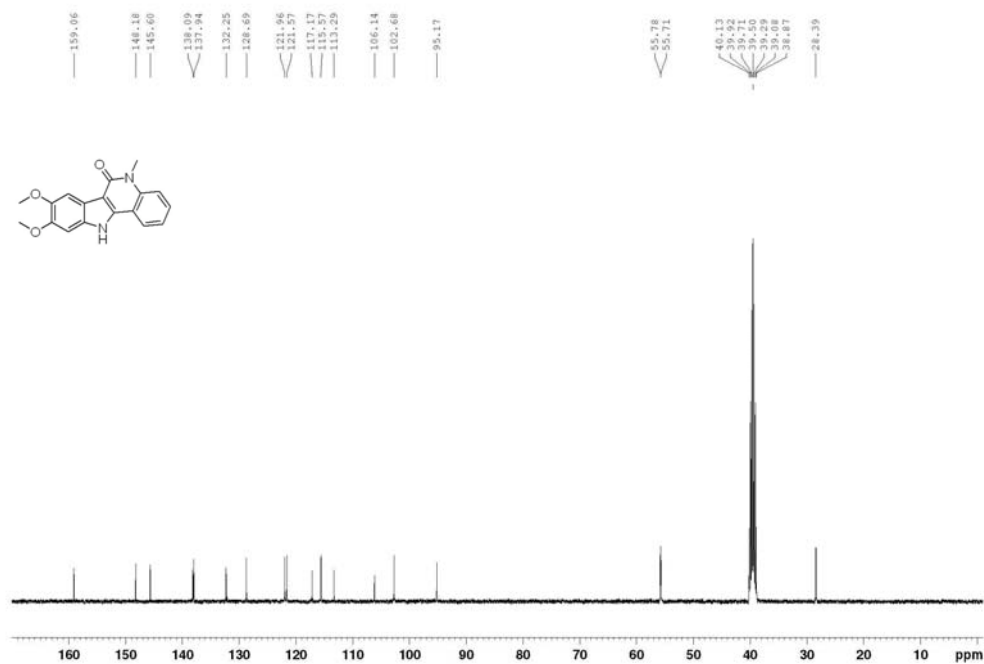

### $^1\text{H}$ NMR of **6f**.

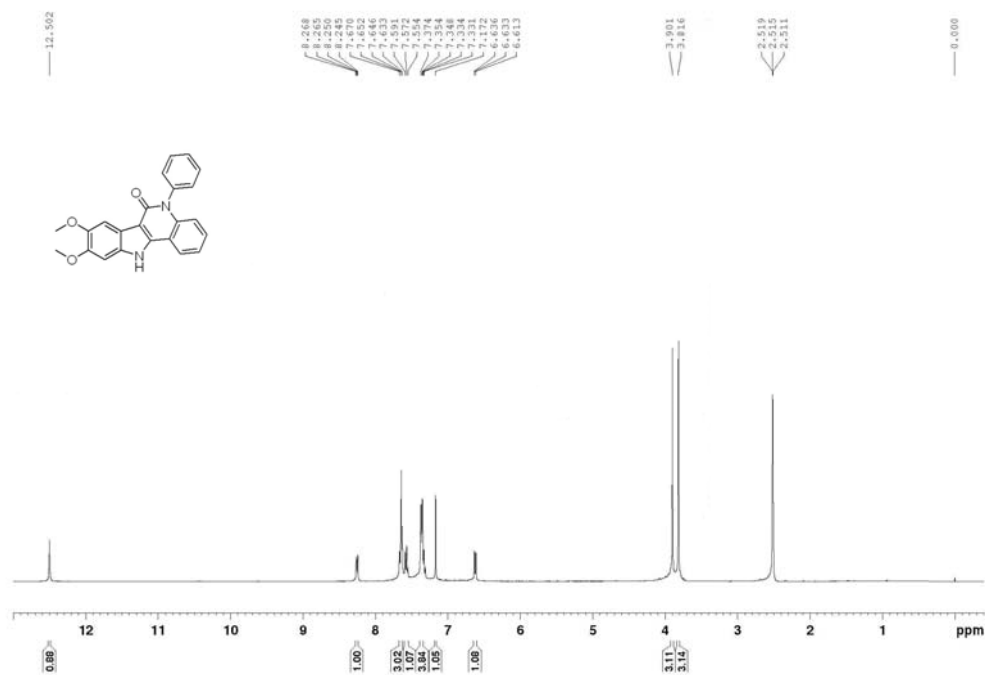

### $^{13}\text{C}$ NMR of **6f**

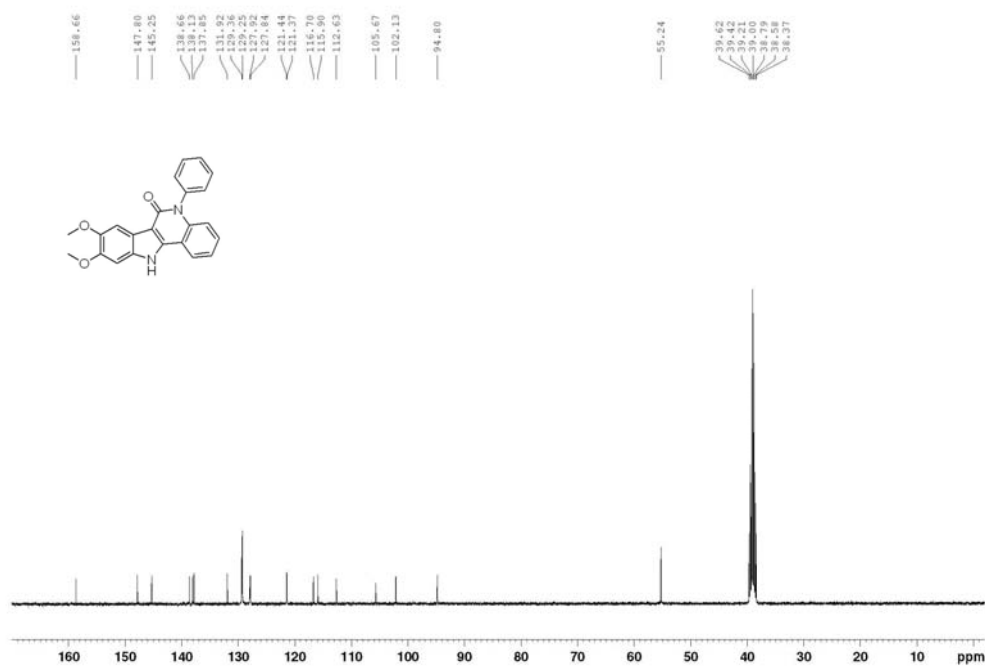

### $^1\text{H}$ NMR of **6g**.

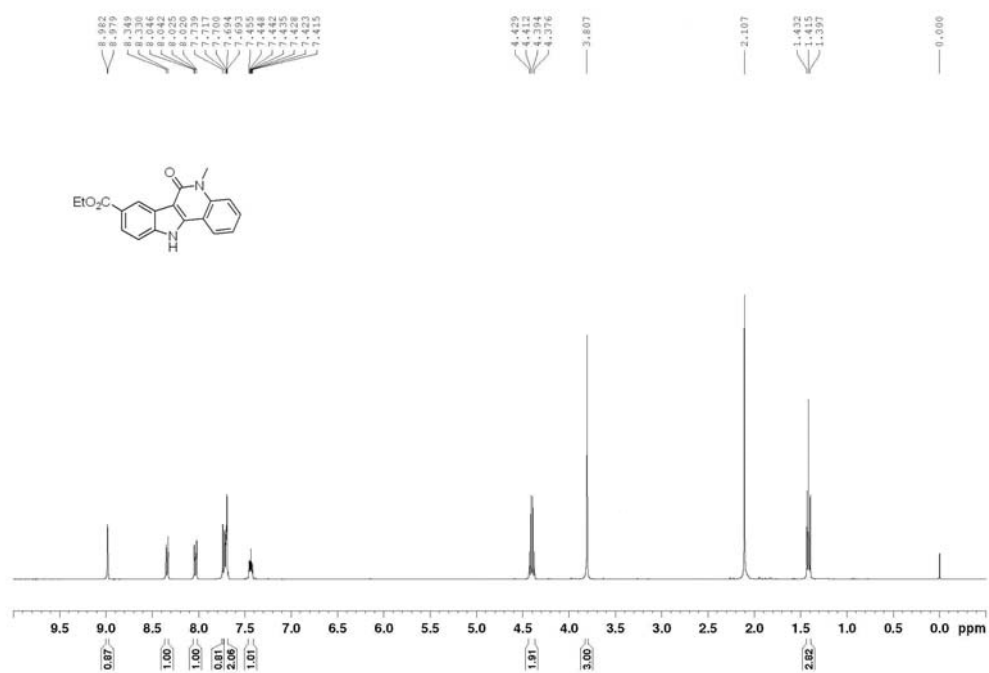

### $^{13}\text{C}$ NMR of **6g**

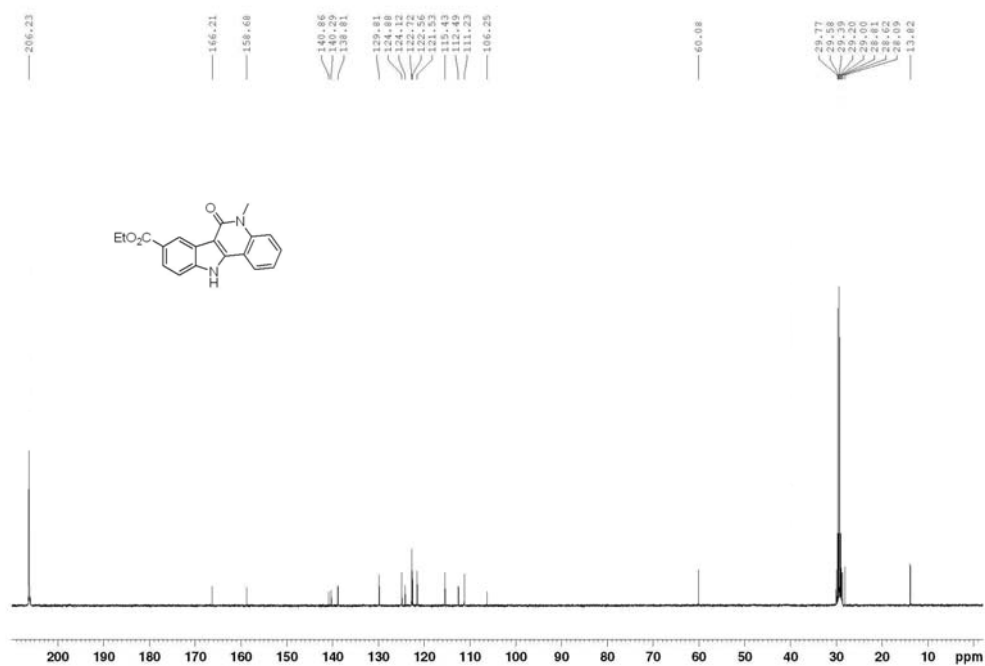

### $^1\text{H}$ NMR of **6h**.

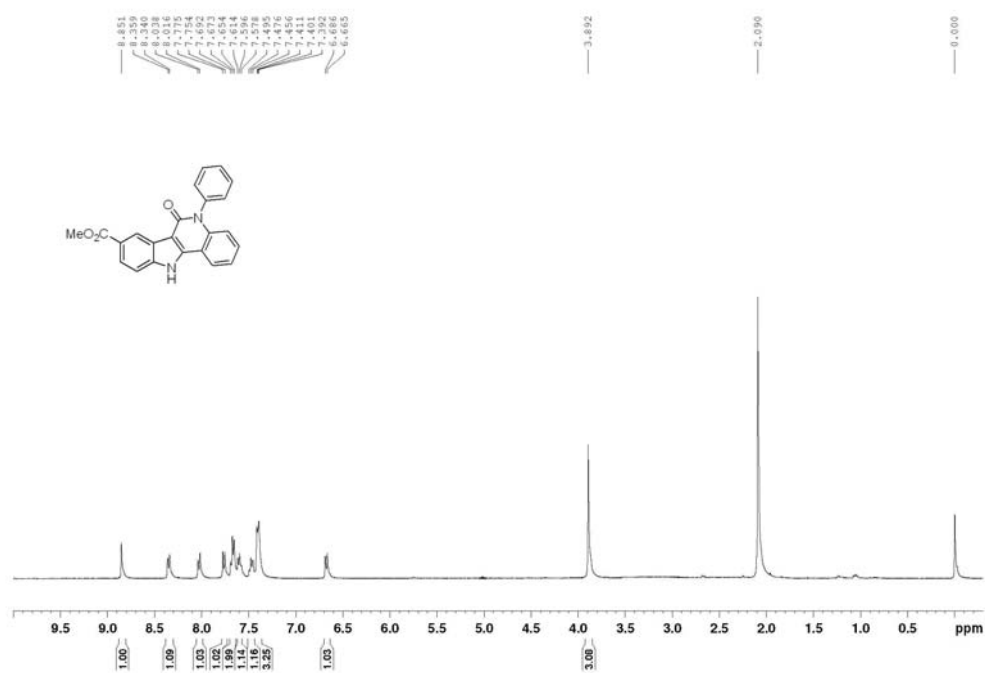

### $^{13}\text{C}$ NMR of **6h**

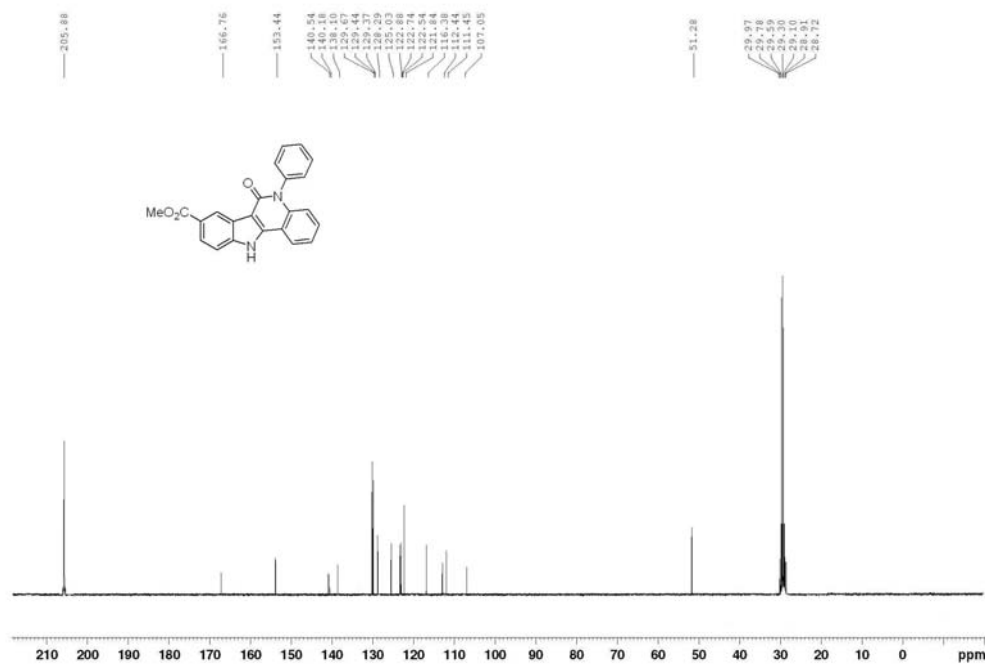

$^1\text{H}$  NMR of **6i**.

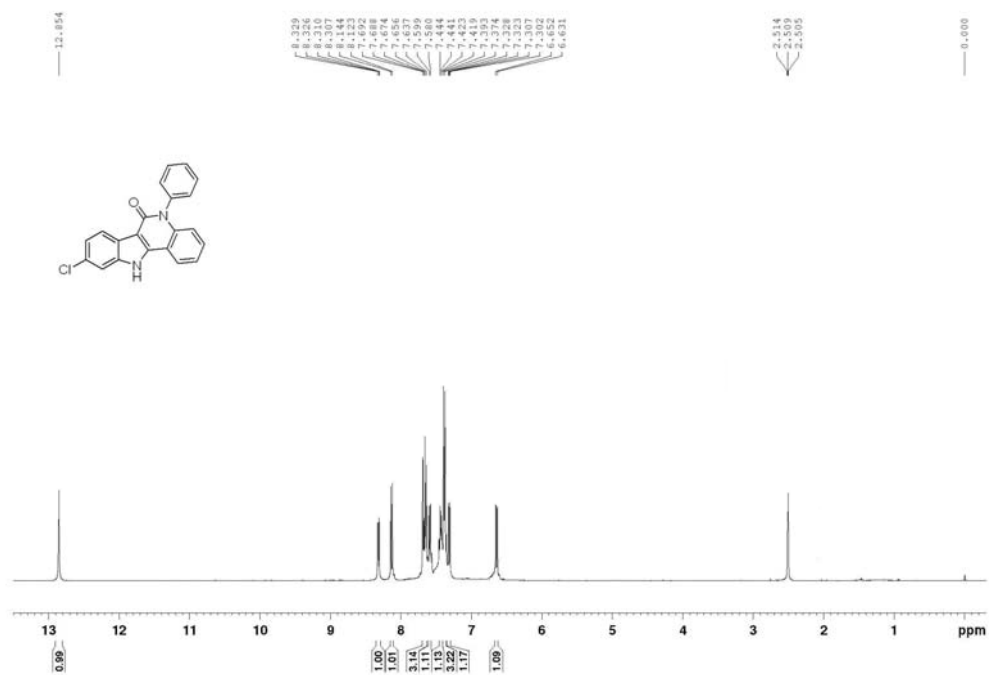

$^{13}\text{C}$  NMR of **6i**

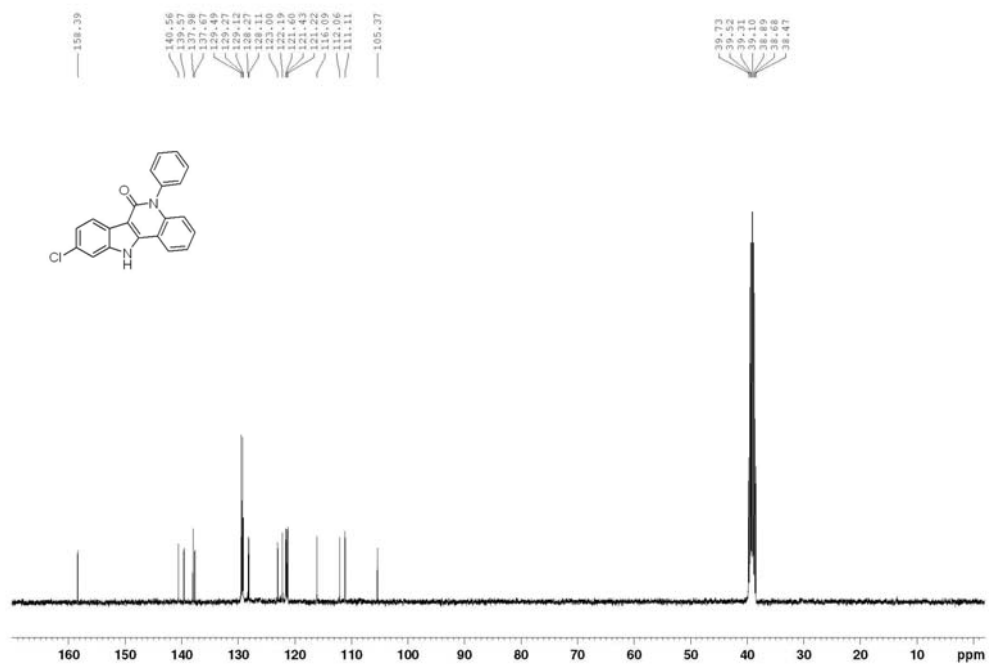

### $^1\text{H}$ NMR of **8a**.

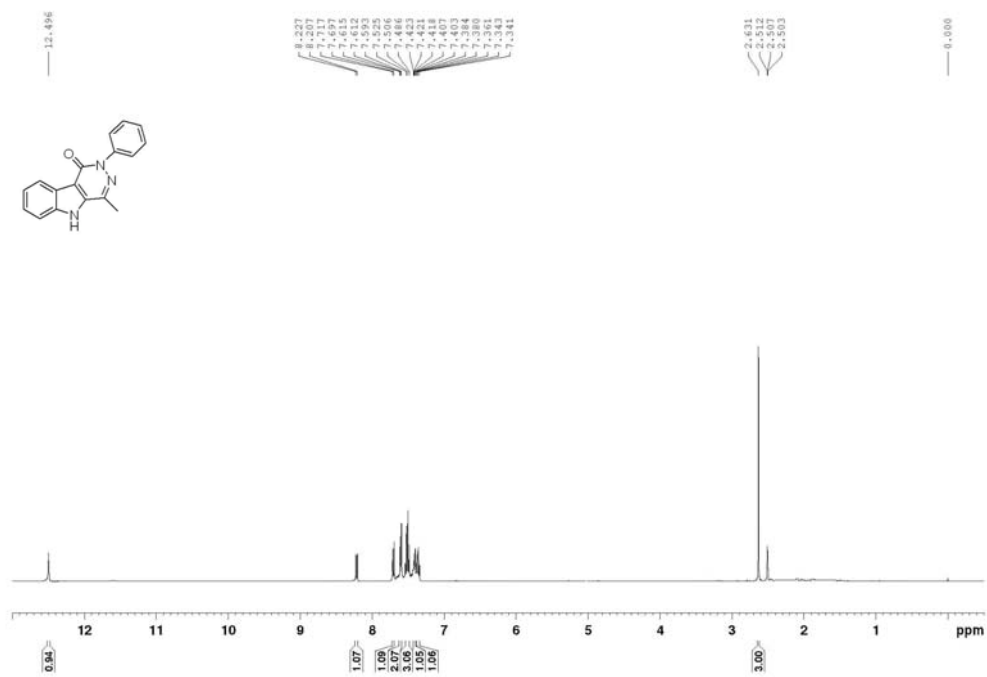

### $^{13}\text{C}$ NMR of **8a**

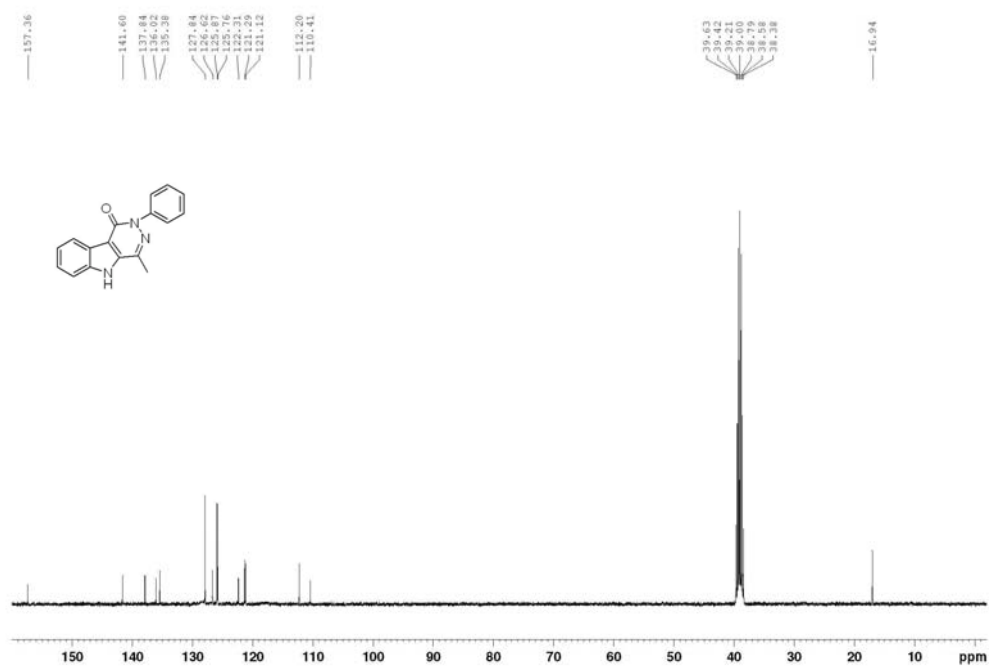



### $^1\text{H}$ NMR of **8b**

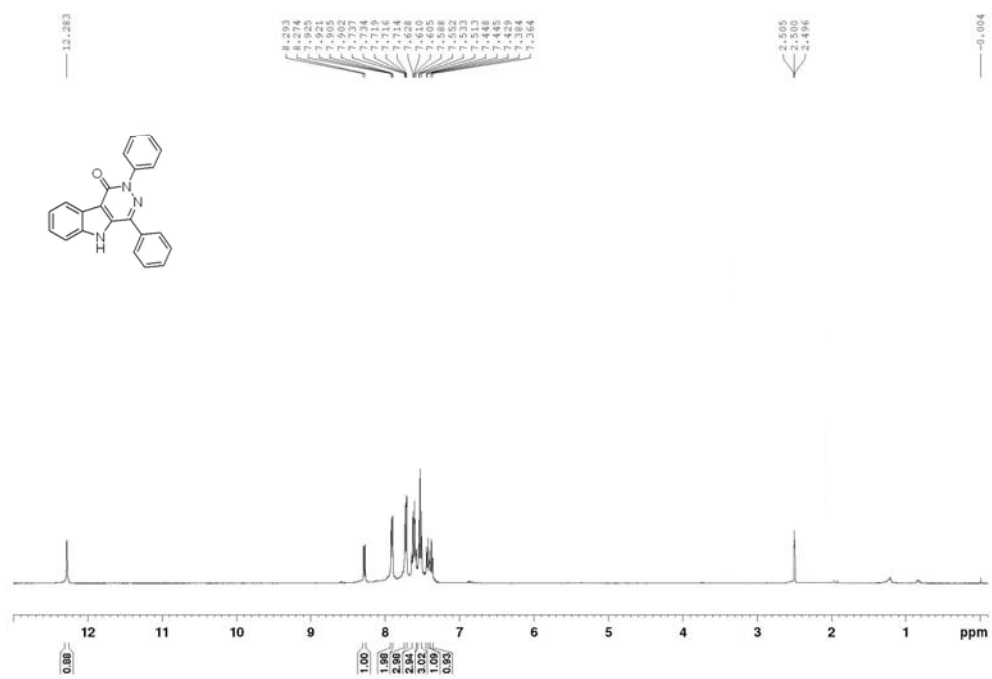

### $^{13}\text{C}$ NMR of **8b**

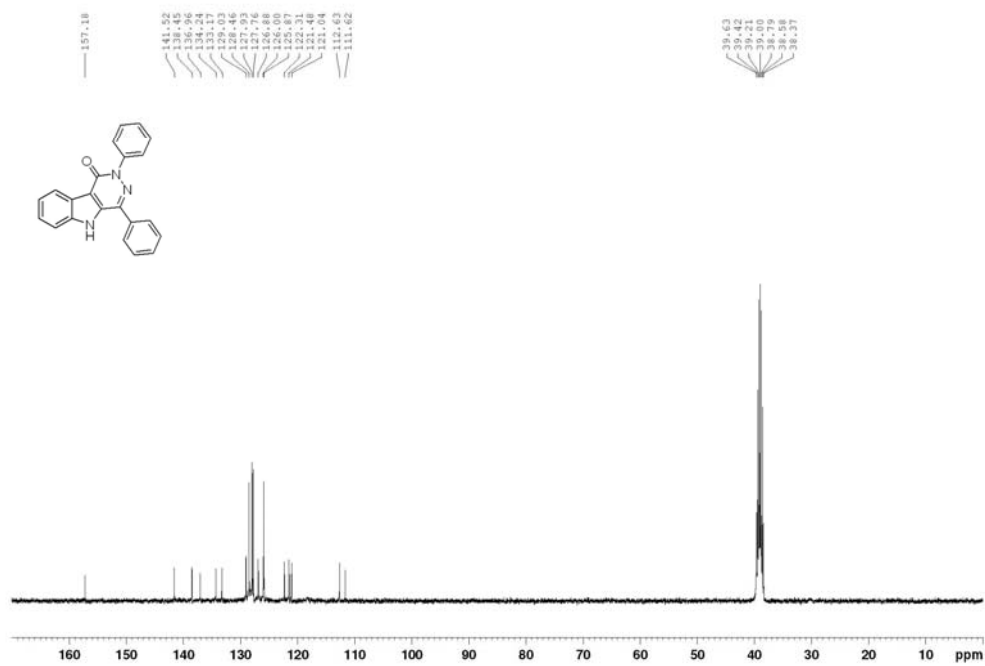

### $^1\text{H}$ NMR of **7a**.

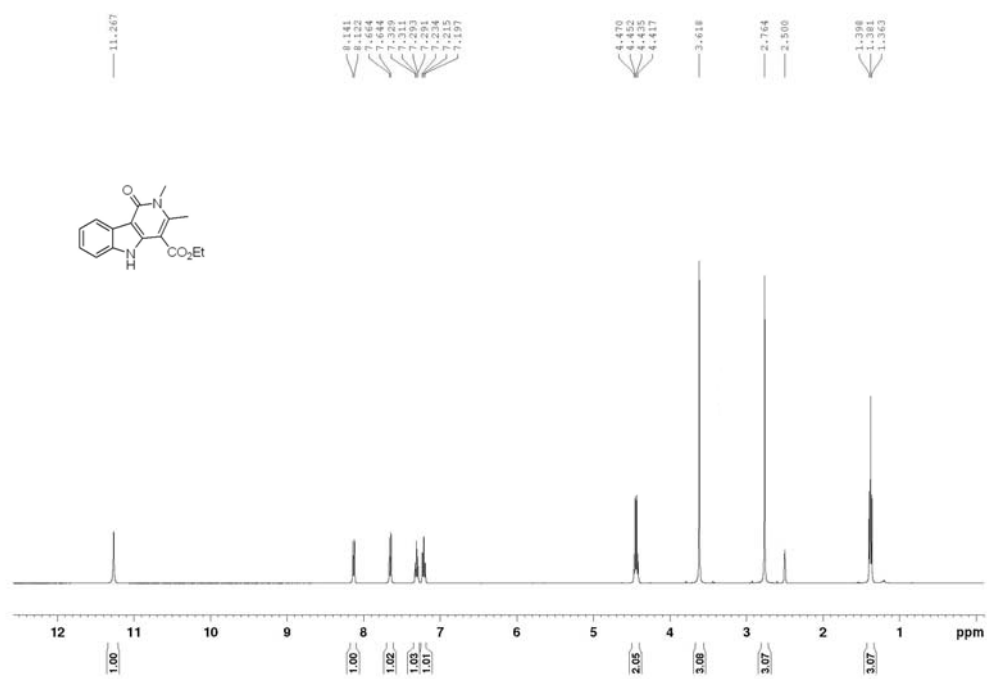

### $^{13}\text{C}$ NMR of **7a**

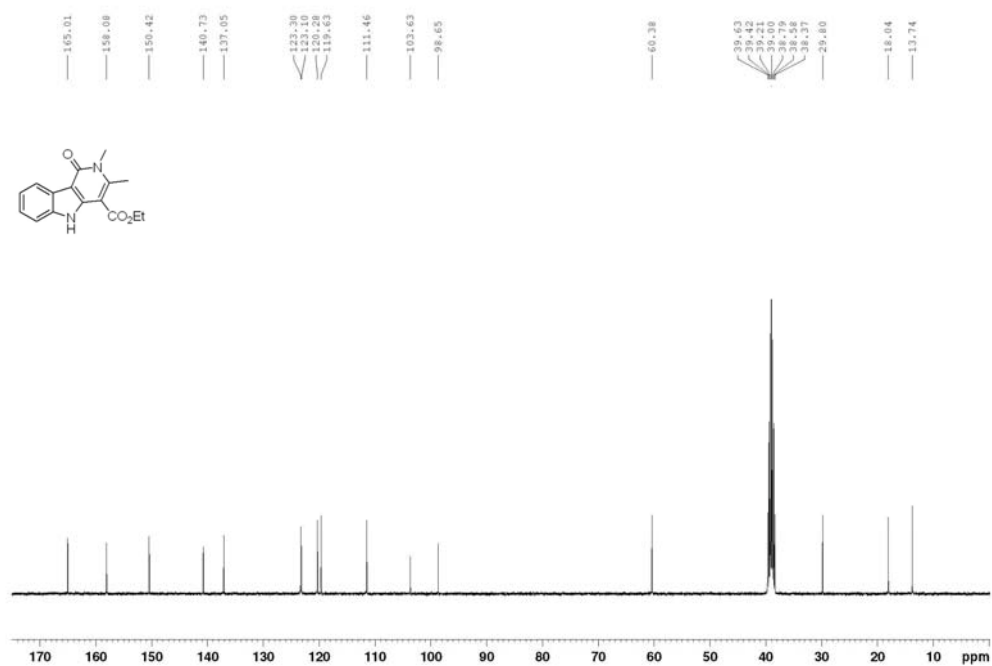

### $^1\text{H}$ NMR of **7b**.

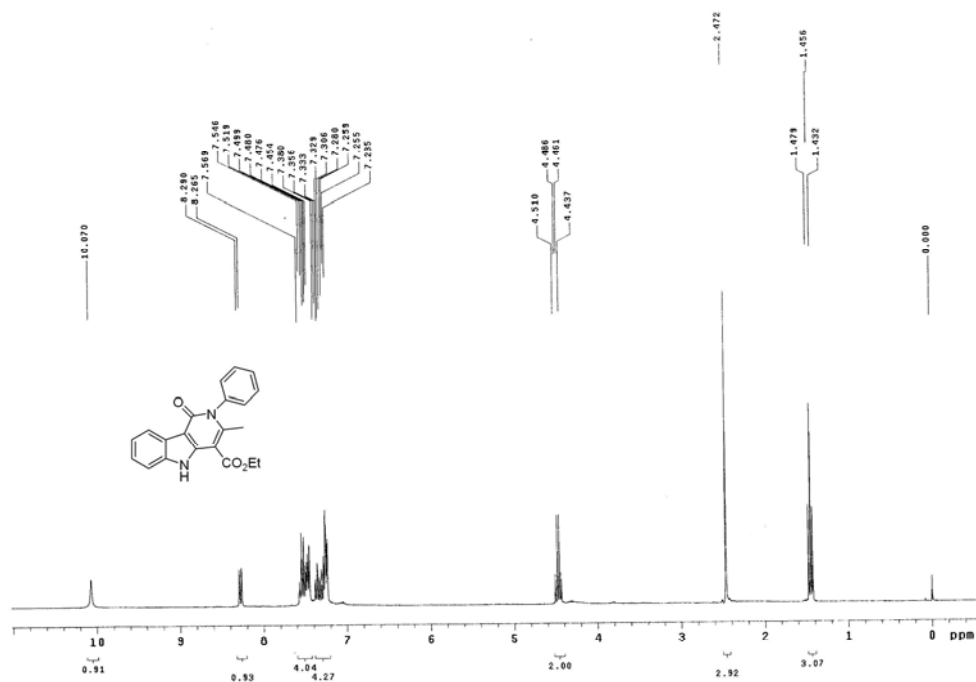

### $^{13}\text{C}$ NMR of **7b**

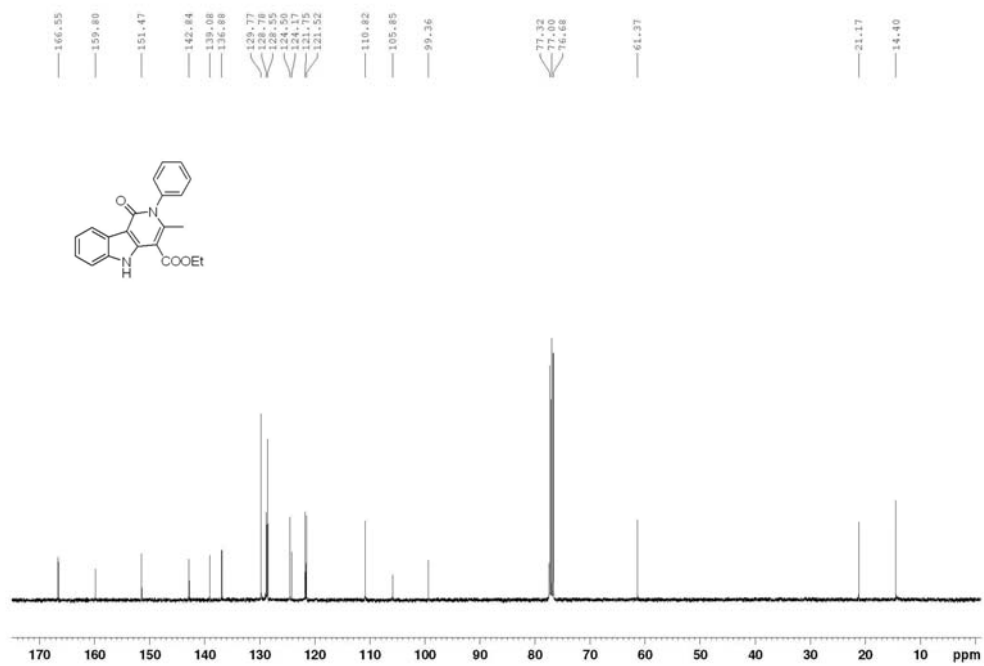

$^1\text{H}$  NMR of **7c**.

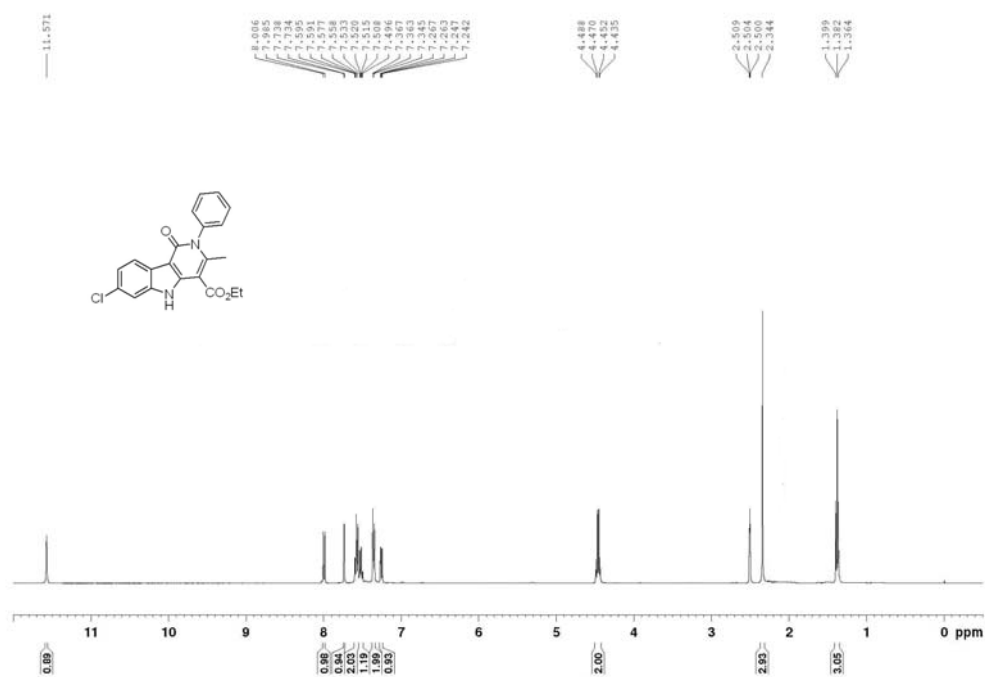

$^{13}\text{C}$  NMR of **7c**

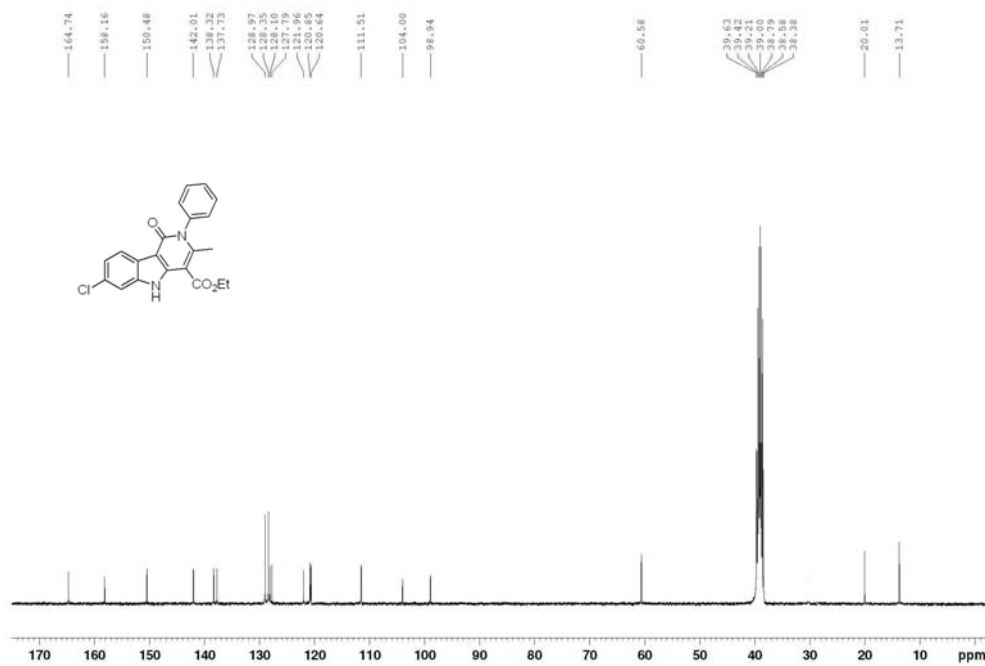

$^1\text{H}$  NMR of **10**.

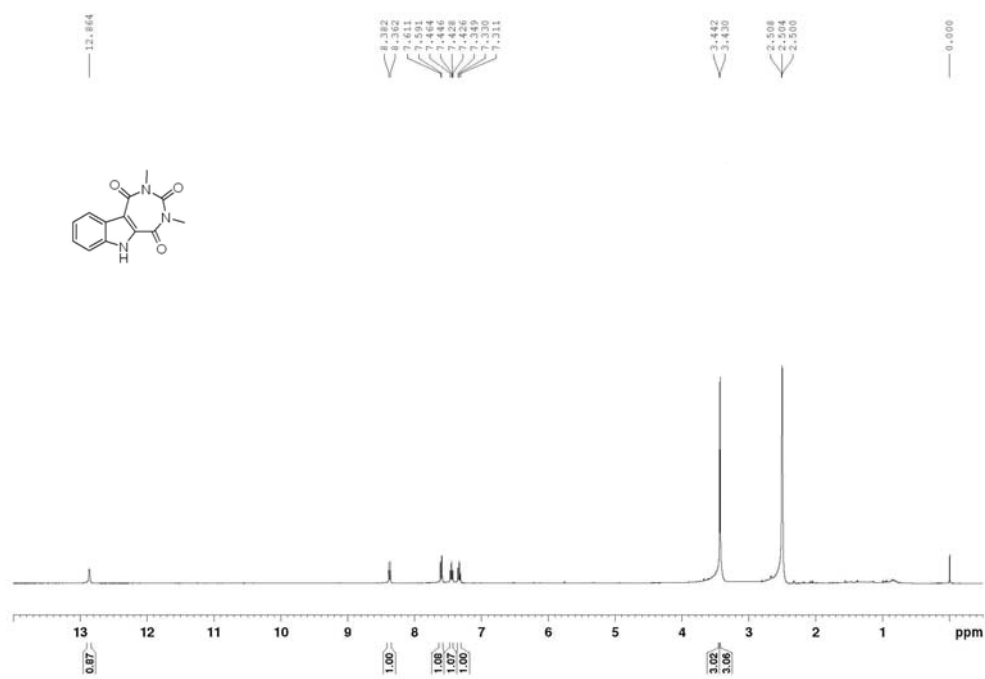

$^{13}\text{C}$  NMR of **10**

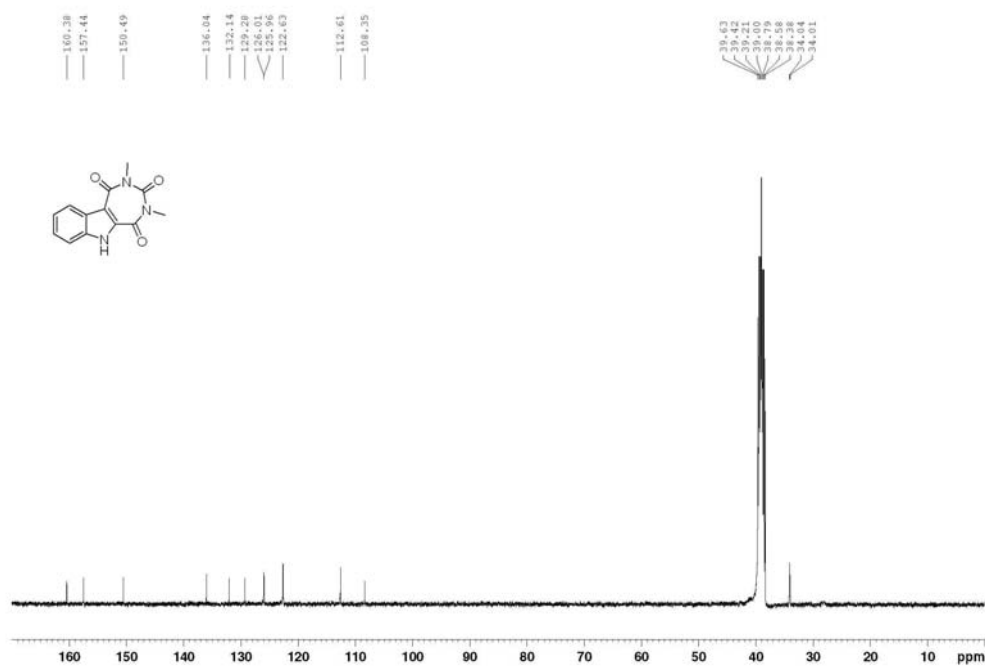

$^1\text{H}$  NMR of **9**.

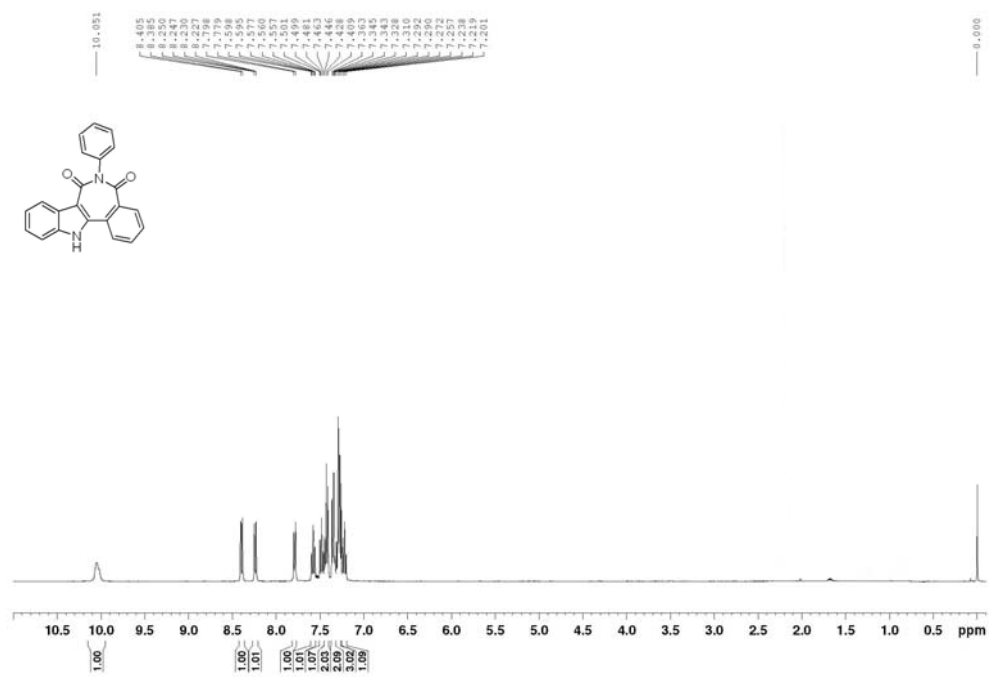

$^{13}\text{C}$  NMR of **9**

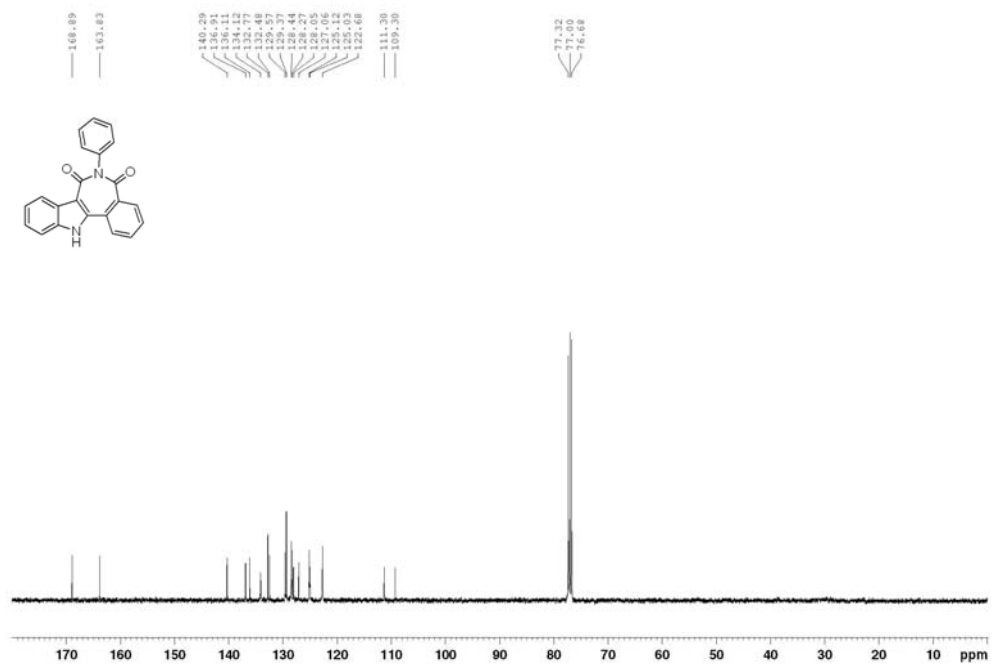

Supplement: c001715a.pdf [file c001715a.pdf]
